# Bayesian selection of Hidden Markov models for multi-dimensional ion channel data

Jan Münch<sup>1\*</sup>, Fabian Paul<sup>2\*</sup>, Ralf Schmauder<sup>1</sup>, Klaus Benndorf<sup>1</sup>

\*For correspondence:

[jan.muench@med.uni-jena.de](mailto:jan.muench@med.uni-jena.de) (JM);  
[klaus.benndorf@med.uni-jena.de](mailto:klaus.benndorf@med.uni-jena.de)  
(KB)

<sup>1</sup>Institut für Physiologie II, Universitätsklinikum Jena, Friedrich-Schiller-Universität Jena, 07740 Jena, Germany; <sup>2</sup>Department of Biochemistry and Molecular Biology, University of Chicago, Chicago, Illinois 60637-1454, U.S.A.

**Abstract** Inferring the complex conformational dynamics of ion channels from ensemble currents is a daunting task due to limited information in the data leading to poorly determined model inference and selection. We address this problem with a parallelized Kalman filter for specifying Hidden Markov Models for current and fluorescence data. We demonstrate the flexibility of this Bayesian network by including different noises distributions. The accuracy of the parameter estimation is increased by tenfold compared to fitting Rate Equations. Furthermore, adding orthogonal fluorescence data increases the accuracy of the model parameters by up to two orders of magnitude. Additional prior information alleviates parameter unidentifiability for weakly informative data. We show that with Rate Equations a reliable detection of the true kinetic scheme requires cross validation. In contrast, our algorithm avoids overfitting by automatically switching of rates (continuous model expansion), by cross-validation, by applying the ‘widely applicable information criterion’ or variance-based model selection.

## Introduction

Ion channels are essential proteins for the homeostasis of an organism. Disturbance of their function by mutations often causes severe diseases, such as epilepsy *Oyres et al. (2018)*; *Goldschen-Ohm et al. (2010)*, sudden cardiac death *Clancy and Rudy (2001)* or sick sinus syndrome *Verkerk and Wilders (2014)* indicating a medical need *Goldschen-Ohm et al. (2010)* to gain further insight into the biophysics of ion channels *Sakmann (2013)*. The gating of ion channels is usually interpreted by kinetic schemes which are inferred from macroscopic currents with rate equations (REs) *Sakmann (2013)* or from single-channel currents using dwell time distributions *Neher and Sakmann (1976)*; *Colquhoun et al. (1981)*; *Horn and Lange (1983)*; *Epstein et al. (2016)*; *Siekmann et al. (2016)* or hidden Markov models (HMMs) *Chung et al. (1990)*; *Fredkin and Rice (1992)*; *Qin et al. (2000)*; *Venkataramanan and Sigworth (2002)*. It is becoming increasingly clear that the use of Bayesian statistics in HMM estimation constitutes a major advantage *Ball F. G. and A. (1999)*; *de Gunst et al. (2001)*; *Rosales et al. (2001)*; *Rosales (2004)*; *Gin et al. (2009)*; *Siekmann et al. (2011, 2012)*; *Hines et al. (2015)*. In ensemble patches, simultaneous orthogonal fluorescence measurement of either conformational changes *Zheng and Zagotta (2000)*; *Taraska and Zagotta (2007)*; *Taraska et al. (2009)*; *Bruening-Wright et al. (2007)*; *Kalstrup and Blunck (2013, 2018)*; *Wulf and Pless (2018)* or ligand binding itself *Biskup et al. (2007)*; *Kusch et al. (2010, 2011)*; *Wu et al. (2011)* has increased insight into the complexity of channel activation.

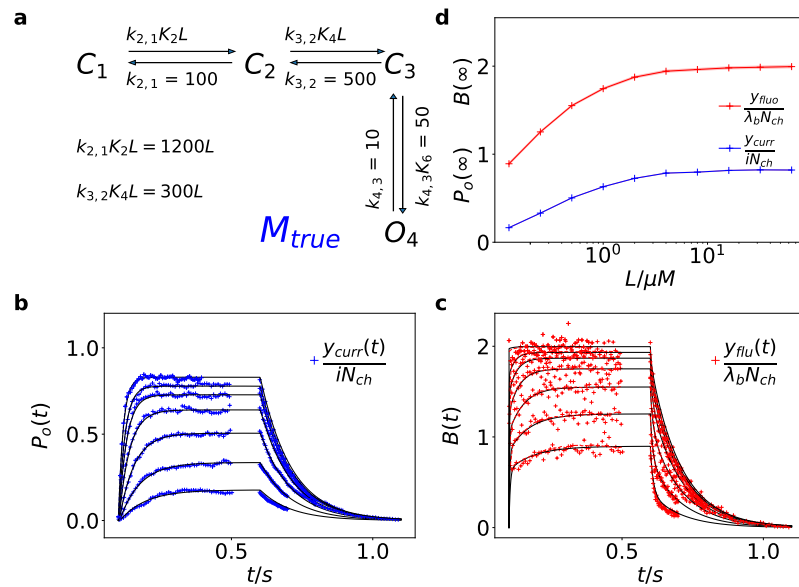

**Figure 1. HMM used for the simulations.** **a**, The kinetic scheme  $M_{true}$  used for simulating the data. The Markov state model (kinetic scheme) consists of two binding steps and one opening step. The rate matrix  $\mathbf{K}$  is parametrized by the absolute rates  $k_{i,j}$ , the ratios  $K_i$  between on and off rates (i.e. equilibrium constants) and  $L$ , the ligand concentration in the solution. The units of the rates are  $s^{-1}$  and  $\mu M^{-1}s^{-1}$  respectively. The liganded states are  $C_2$ ,  $C_3$ ,  $O_4$ . The open state  $O_4$  conducts a mean single-channel current  $i = 1$ . **b-c**, Normalized time traces of simulated relaxation experiments of ligand concentration jumps with  $N_{ch} = 10^3$  channels,  $\lambda_b = 0.375$  mean photons per bound ligand per frame and single-channel current  $i = 1$ . The current  $y_{curr}$  and fluorescence  $y_{flu}$  time courses are calculated from the same simulation run to mimic the experiment. For visualization, the signals are normalized by the respective median estimates of the KF. The fluctuation of the current traces is due to gating noise, instrumental noise with the variance  $\sigma_m^2 = i^2$  and open-channel noise  $\sigma_{op}^2 = 0.1i^2$ . The fluctuation of fluorescence is caused by stochastic binding and Poisson counting noise of photons. The black lines are the theoretical open probabilities  $P_o(t)$  and the average binding per channel  $B(t)$  for  $N_{ch} \rightarrow \infty$  of the used model. The ligand concentrations are 0.125, 0.25, 0.5, 1, 2, 4, 8, 16, 64  $\mu M$ . **d**, Equilibrium binding and open probability as function of the ligand concentration  $L$ .

41 Currently, a Bayesian estimator that can collect information from cross-correlations and time cor-  
 42 relations inherent in multi-dimensional signals of ensembles of ion channels is still missing. Tra-  
 43 ditionally, macroscopic currents are analyzed with solutions of rate equations (REs) which yield  
 44 a point estimate of the rate matrix or its eigenvalues *Colquhoun et al. (1997); Sakmann (2013);*  
 45 *Alcantara et al. (2002); Wang et al. (2012)*. The RE approach is based on a deterministic differen-  
 46 tial equation derived by averaging the chemical master equation (CME) for the underlying kinetic  
 47 scheme *Kurtz (1972); Van Kampen (1992); Jahnke and Huisinga (2007a)*. Its accuracy can be im-  
 48 proved by processing the information contained in the intrinsic noise (stochastic gating and bind-  
 49 ing) *Milescu et al. (2005); Munsky et al. (2009)*. Nevertheless, all deterministic approaches do not  
 50 use the information of the time- and cross-correlations of the intrinsic noise. These deterministic  
 51 approaches are asymptotically valid for an infinite number of channels. Thus, a time trace with  
 52 a finite number of channels contains, strictly speaking, only one independent data point. Some  
 53 rigorous attempts to incorporate the intrinsic noise of current data into the estimation *Celentano*  
 54 *and Hawkes (2004)* suffer from cubic computational complexity in the amount of data points, ren-  
 55 dering the algorithm impractical for real data. Stepanyuk suggested a faster algorithm *Stepanyuk*  
 56 *and Borisyuk (2011); Stepanyuk et al. (2014)*. Advanced approaches to analyze single-molecule  
 57 data such as HMMs make use of solutions of the stochastic CME *Jahnke and Huisinga (2007b) Qin*  
 58 *et al. (2000); Venkataramanan and Sigworth (2002)*. A HMM consists of a discrete set of metastable  
 59 states. Changes of their occupation occur as random events over time. Each state is characterized  
 60 by transition rates in addition to its signal observation probability distribution *Rabiner (1989)*. HMM

66 **Box 1. Illustration of two statistical problems in patch-clamp**  
68 **recordings addressed by a Bayesian network**

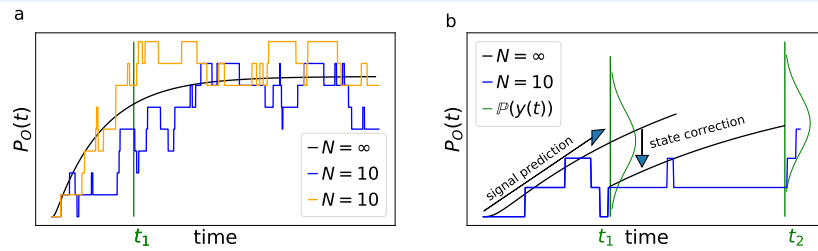

69 **Box 1 Figure 1. a**, Idealized patch-clamp (PC) data in the absence of instrumental noise for either ten  
70 (colored) or an infinite number of channels generating the mean time trace (black). The fluctuations from  
71 the mean time trace (black) reveal autocorrelation, the deviation at one time-point depends on the deviation  
72 on the previous time point **b**, Conceptual idea of the Kalman Filter (KF): the stochastic evolution of  
73 the ensemble signal is predicted and the prediction model updated recursively.  
74

75 The two major problems for parameter inference for the dynamics of the ion channel ensemble  
76  $\mathbf{n}(t)$  are: **(I)** that currents are only low dimensional observations (e.g. one dimension for  
77 patch clamp or two for cPCF) of a high-dimensional process (dimension being the number  
78 of model states) blurred by noise and **(II)** the fluctuations from the stochastic gating process  
79 cause autocorrelation in the signal. Traditional analyses for macroscopic PC data (and also  
80 for related fluorescence data) by the RE approach, e.g. *Milescu et al. (2005)* ignores the long-  
81 lasting autocorrelations of the deviations (see blue and orange curves) from the mean time  
82 trace (black) that occur in real data measured from a *finite* ensemble. Assuming a white-noise  
83 process is never met in real data due to the Markovian nature of the system. **b**, In order to  
84 account for the autocorrelation in the signal, an optimal prediction of the signal distribution  
85  $\mathbb{P}(y)$  at the future time step  $t_2$  should use the measurement  $y$  from the current time step  $t_1$   
86 to update the belief about the underlying hidden ensemble state  $\mathbf{n}(t_1)$ . Based on stochastic  
87 modelling of the time evolution of the channel ensemble, it then predicts  $\mathbb{P}(y(t_2))$ .

61 approaches are more accurate than fitting dwell time distributions for noisy recordings of rapidly  
62 gating channels *Venkataramanan and Sigworth (2002)* but the computational complexity limits  
63 this type of analysis in ensemble patches to no more than a few hundred channels per time trace  
64 *Moffatt (2007)*.

65  
66  
67  
68  
69  
70  
71  
72  
73  
74  
75  
76  
77  
78  
79  
80  
81  
82  
83  
84  
85  
86  
87  
88 To tame the computational complexity *Jahnke and Huisinga (2007b)*, we approximate the so-  
89 lution of the CME with a Kalman filter (KF), thereby remaining in a stochastic framework *Kalman*  
90 *(1960)*. This allows us to explicitly model the time evolution of the first two moments of the probabil-  
91 ity distribution of the hidden channel states. Notably, the KF is optimal in producing a minimal pre-  
92 diction error for the mean state. KFs have been used previously in several protein expression stud-  
93 ies *Komorowski et al. (2009)*; *Finkenstädt et al. (2013)*; *Fearnhead et al. (2014)*; *Folia and Rattray*  
94 *(2018)*. Our approach generalizes the work of Moffatt *Moffatt (2007)* by including state-dependent  
95 fluctuations such as open-channel noise and Poisson noise in additional fluorescence data.  
96 Stochastic rather than deterministic modeling is generally preferable for small systems or non-  
97 linear dynamics *Van Kampen (1992)*; *Gillespie and Golightly (2012)*. However, even with simulated  
98 data of  $10^4$  channels per time trace, the KF outperforms the deterministic approach in estimating  
99 the model parameters and model selection. Moffatt *Moffatt (2007)* already demonstrated the ad-  
100 vantage of the KF to learn absolute rates from time traces at equilibrium. Other benefits are the  
101 ability to infer the number of channels  $N_{\text{ch}}$  for each time trace, the single-channel current  $i$  and

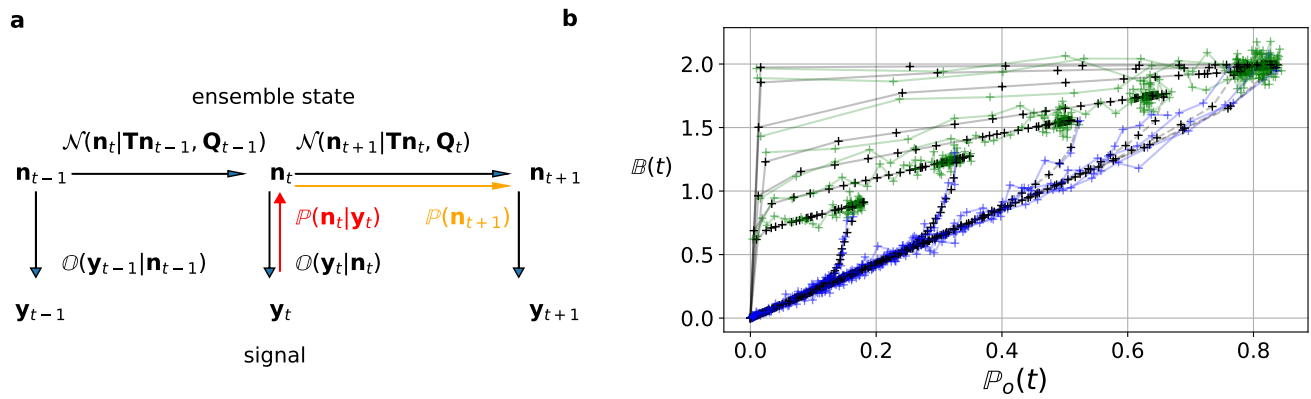

**Figure 2. KF as Bayesian network.** **a**, Graphical model of the conditional dependencies of the stochastic process. Horizontal black arrows represent the conditional multivariate normal transition probability  $\mathcal{N}(n_t | \mathbf{T}n_{t-1}, \mathbf{Q}_{t-1})$  of a continuous state Markov process. Notably, it is  $n(t)$  which is treated as the Markov state by the KF. The transition matrix  $\mathbf{T}$  and the time-dependent covariance  $\mathbf{Q}_t = \mathbf{Q}(\mathbf{T}, n_t)$  characterise the single-channel dynamics. The vertical black arrows represent the conditional observation distribution  $\mathcal{O}(y_t | n_t)$ . The observation distribution summarizes the noise of the experiment, which in the KF is assumed to be multivariate normal. Given a set of model parameters and a data point  $y_t$ , the Bayesian theorem allows to calculate in the correction step  $\mathbb{P}(n_t | y_t)$  (red arrow). The posterior is propagated linearly in time by the model, predicting a state distribution  $\mathbb{P}(n_{t+1})$  (orange arrow). The propagated posterior predicts together with the observation distribution the mean and covariance of the next observation. Thus, it creates a multivariate normal likelihood for each data point in the observation space. **b**, Observation space trajectories of the predictions and data of the binding per channel vs. open probability. The curves are normalized by the median estimates of  $\lambda_b$ ,  $i$  and  $N_{\text{ch}}$  and the ratio of open-channels  $\frac{y_{\text{curr}}}{N_{\text{ch}} i}$  which approximates the open probability  $P_o(t)$ . The black crosses represent  $\mathbf{H}n_{t+1}$ , the mean of the parameter samples of the predicted signal for each data point of the KF. The green and blue trajectories represent the part of the time traces with a non-zero ligand concentration and a zero ligand concentration in the bulk, respectively.

102 the mean number  $\lambda_b$  of photons from bound ligands per recorded frame. Thus no error-prone  
 103 normalizations of the signal typical for deterministic (i.e. averaging) approaches is needed. The KF  
 104 provides a likelihood which makes it possible to combine the time trace data during analysis with  
 105 any other data that admits modelling with a likelihood.

106 To select models and to identify parameters, stochastic models are formulated within the frame-  
 107 work of Bayesian statistics where parameters are assigned uncertainties by treating them as ran-  
 108 dom variables *Hines (2015); Ball (2016)*. In contrast, previous work on ensemble currents combined  
 109 the KF only with maximum likelihood (ML) estimation *Moffatt (2007)* and did not derive model se-  
 110 lection strategies. Difficulties in treating simple stochastic models by ML approaches in combina-  
 111 tion with the KF *Auger-Methe Marie et al. (2016)*, especially with non-observable dynamics, justify  
 112 the computational burden of Bayesian statistics. Bayesian inference provides outmatching tools  
 113 for modeling: First, information from other experiments, simulations or from theory can be in-  
 114 tegrated through prior probabilities. Hence, uncertainties in the model parameters prior to the  
 115 experiment are correctly accounted for in the analyses of the new data. For weakly informative  
 116 data we demonstrate the beneficial effect of incorporating theoretical knowledge such as diffu-  
 117 sion limited binding by prior distributions onto the posterior. Second, the Bayesian approach is  
 118 still applicable in situations where parameters are not identifiable *Hines et al. (2014); Middendorf*  
 119 *and Aldrich (2017)* or posteriors are non-Gaussian, whereas ML fitting ceases to be valid *Calder-*  
 120 *head et al. (2013); Watanabe (2007)*. Third, a Bayesian approach provides superior model selection  
 121 tools for singular models such as HMMs *Kienker (1989)*.

122 The best fitting model will be defined as that one with the highest predictive accuracy, esti-  
 123 mated either by cross-validation against held-out test data or by information criteria *Gelman et al.*  
 124 *(2014)*. Information criteria allow for model testing on training data instead of hold-out data by  
 125 performing a bias-corrected computation of the predictive accuracy *Gelman et al. (2014)*. We use  
 126 the recently developed Widely Applicable Information Criterion (WAIC) *Watanabe (2010)* relying  
 127 on the Bayesian paradigm. In contrast to its predecessor, the Akaike Information Criterion (AIC),  
 128 WAIC asymptotically approximates the predictive accuracy of the model correctly, even for singular

129 models *Watanabe (2010)* such as HMMs or KFs. Moreover, we show that fitting current data with  
 130 REs, both AIC and WAIC fail to detect overfitting, which demonstrates the importance of correctly  
 131 modeling the intrinsic noise. Additionally, we propose a second-moment based model selection  
 132 criterion which is enabled by the KF and improved by simultaneous measurement of fluorescence  
 133 and current signals using cPCF.

## 134 Results and Discussion

### 135 Simulation of relaxing cPCF data

136 As an exemplary HMM we assume a ligand-gated channel with two ligand binding steps and one  
 137 open-closed isomerization (see Fig. 1a). We define the ensemble state vector

$$\mathbf{n}(t) := (n_1(t), n_2(t), n_3(t), n_4(t))^T = \sum_{i=1}^{N_{\text{ch}}} \mathbf{s}_i(t), \quad (1)$$

138 which counts the number of channels in each state  $\mathbf{s}$  (see Methods). A qualitative description of  
 139 two statistical problems inherent in a stochastic a time series with an RE approach and the Basic  
 140 idea of the KF is outlined in Box. 1. At first we assume that the fluorescence signal originates only  
 141 from bound ligands (Fig. 3). Later also the signal of unbound ligands and the correction using a  
 142 reference dye will be included (see Figs. 4-7, Appendix, and Methods section ). Example data are  
 143 shown in Figs. 1b-d.

### 144 Kalman filter derived from a Bayesian network

145 Here and in the Methods section, we derive the mathematical tools to account correctly for the  
 146 stochastic Markov dynamics of single molecules in the fluctuations of macroscopic signals. The  
 147 KF is a Bayesian network (see Methods), i.e. a continuous state HMM with a multivariate normal  
 148 transition probability *Ghahramani (1997)* (Fig. 2a). To make use of the KF, we assume the following  
 149 general form of the dynamic model: The evolution of the hidden state vector  $\mathbf{n}(t)$  is determined by  
 150 a linear model that is parametrized by the state evolution matrix  $\mathbf{T}$

$$\mathbf{n}_{t+1} \sim \mathcal{N}(\cdot | \mathbf{T}\mathbf{n}_t, \mathbf{Q}_t) = \mathbf{T}\mathbf{n}_t + \boldsymbol{\omega}_t, \quad (2)$$

151 where  $\sim$  means sampled from and  $\mathcal{N}$  is a shorthand for the multivariate normal distribution. The  
 152 mean of the hidden state evolves according to the equation  $\mathbb{E}[\mathbf{n}_{t+1} | \mathbf{n}_t] = \mathbf{T}\mathbf{n}_t$ . It is perturbed by  
 153 normally-distributed noise  $\boldsymbol{\omega}$  with the following properties: The mean value of the noise fulfills  
 154  $\mathbb{E}[\boldsymbol{\omega}_t] = 0$  and the variance-covariance matrix determines the noise  $\text{cov}[\boldsymbol{\omega}_t, \boldsymbol{\omega}_t] = \mathbf{Q}(\mathbf{T}, \mathbf{n}_{t-1})$  (Methods  
 155 Eq. 34d). In short, Eq. 1a defines a continuous state Gaussian Markov process. The observations  $\mathbf{y}_t$   
 156 depend linearly on the hidden state  $\mathbf{n}_t$ . The linear map is determined by an observation matrix  $\mathbf{H}$ .

$$\mathbf{y}_t \sim \mathbb{O}(\cdot | \mathbf{H}\mathbf{n}_t) := \mathcal{N}(\cdot | \mathbf{H}\mathbf{n}_t, \boldsymbol{\Sigma}_t) = \mathbf{H}\mathbf{n}_t + \mathbf{v}_t, \quad (3)$$

157 The noise of the measurement setup (Appendix 3 and Eq. 39) is modeled as a random perturbation  
 158 of the mean observation vector. The noise fulfills  $\mathbb{E}[\mathbf{v}_t] = 0$  and  $\text{cov}[\mathbf{v}_t, \mathbf{v}_t] = \boldsymbol{\Sigma}_t$ . Eq. 3 defines the  
 159 state-conditioned observation distribution  $\mathbb{O}$  (Fig. 2a).

160 For each element in a sequence of hidden states  $\{\mathbf{n}_t : 0 < t < T\}$  and for a fixed set of parameters  
 161  $\boldsymbol{\theta}$ , an algorithm based on a Bayesian network (Fig. 2a), exploits the conditional dependencies of  
 162 the assumed stochastic process. A Bayesian network recursively predicts (prior) distributions for  
 163 the next  $\mathbf{n}_t$

$$\mathbb{P}(\mathbf{n}_t) = \int \mathbb{P}(\mathbf{n}_t | \mathbf{n}_{t-1}) \mathbb{P}(\mathbf{n}_{t-1} | \mathbf{y}_{t-1}) d\mathbf{n}_{t-1}, \quad (4)$$

164 given what is known at time  $t-1$ . The KF as a special Bayesian network assumes that the transition  
 165 probability is multivariate normal according to Eq. 2a

$$\mathbb{P}(\mathbf{n}_t) = \int \mathcal{N}(\mathbf{n}_t | \mathbf{T}\mathbf{n}_{t-1}, \mathbf{Q}_{t-1}) \mathbb{P}(\mathbf{n}_{t-1} | \mathbf{y}_{t-1}) d\mathbf{n}_{t-1} \quad (5)$$

166 Each prediction of  $\mathbf{n}_t$  (Eq. 5) is followed by a correction step,

$$\mathbb{P}(\mathbf{n}_t | \mathbf{y}_t) = \frac{\mathbb{O}(\mathbf{y}_t | \mathbf{n}_t) \mathbb{P}(\mathbf{n}_t)}{\int \mathbb{O}(\mathbf{y}_t | \mathbf{n}_t) \mathbb{P}(\mathbf{n}_t) d\mathbf{n}_t}, \quad (6)$$

167 that allows to incorporate the current data point into the estimate, based on the Bayesian theo-  
168 rem *Chen et al. (2003)*. Additionally, the KF assumes *Anderson and Moore (2012)*; *Moffatt (2007)* a  
169 multivariate normal observation distribution

$$\mathbb{P}(\mathbf{n}_t | \mathbf{y}_t) = \frac{\mathcal{N}(\mathbf{y}_t | \mathbf{H}\mathbf{n}_t, \boldsymbol{\Sigma}_t) \mathbb{P}(\mathbf{n}_t)}{\int \mathcal{N}(\mathbf{y}_t | \mathbf{H}\mathbf{n}_t, \boldsymbol{\Sigma}_t) \mathbb{P}(\mathbf{n}_t) d\mathbf{n}_t}, \quad (7)$$

170 If the initial prior distribution is multivariate normal then due the mathematical properties of the  
171 normal distributions all priors and posteriors  $\mathbb{P}(\cdot)$  in Eq. 3b and 4b become multivariate normal  
172 *Chen et al. (2003)*. In this case one can derive algebraic equations for the prediction (Methods  
173 Eq. 33 and 34d) and correction (Methods Eq. 54 and Eq. 54) of the mean and covariance. Due to  
174 the recursiveness of its equations, the KF has a time complexity that is linear in the number of  
175 data points, allowing a fast algorithm. The denominator of Eq. 7 is the normal distributed marginal  
176 likelihood  $\mathbb{L}(\mathbf{y}_t | \mathcal{Y}_{t-1}, \boldsymbol{\theta})$  for each data point, which constructs by

$$\mathbb{L}(\mathcal{Y}_T | \boldsymbol{\theta}) = \prod_{t=2}^{N_T} \mathbb{L}(\mathbf{y}_t | \mathcal{Y}_{t-1}, \boldsymbol{\theta}) = \prod_{t=2}^{N_T} \int \mathbb{O}(\mathbf{y}_t | \mathbf{n}_t) \mathbb{P}(\mathbf{n}_t | \mathcal{Y}_{t-1}, \boldsymbol{\theta}) d\mathbf{n}_t = \prod_{t=2}^{N_T} \mathcal{N}(\mathbf{y}_t | \mathbf{H}\mathbb{E}[\mathbf{n}_t], \mathbf{H}\mathbf{P}_t\mathbf{H}^T + \boldsymbol{\Sigma}_t), \quad (8)$$

177 a product marginal likelihood of normal distributions of the whole time trace  $\mathcal{Y}_T = \{\mathbf{y}_1, \dots, \mathbf{y}_{N_T}\}$  of  
178 length  $N_T$  for the KF. For the derivation of  $\mathbf{P}_t$  and  $\boldsymbol{\Sigma}_t$ , see Methods Eq. 34d and Eq. 39. The likelihood  
179 for the data allows to ascribe a probability to the parameters  $\boldsymbol{\theta}$ , given the observed data (Methods  
180 Eq. 18). An illustration for the operation of the KF on the observation space (Fig. 2b). The predicted  
181 mean signal  $\mathbf{H}\mathbb{E}[\mathbf{n}(t)]$  and the data are plotted as vector trajectories.

182 For signals with Poisson-distributed photon counting or open-channel noise Eq. 7 becomes in-  
183 tractable. By applying the theorem of total variance decomposition *Weiss (2005)*, we derive the  
184 output statistics that approximate various forms of noise and cast them into the form of Eq. 3  
185 (Methods Eq. 53). The Bayesian posterior distribution

$$\mathbb{P}(\boldsymbol{\theta} | \mathcal{Y}_T) \sim \mathbb{L}(\mathcal{Y}_T | \boldsymbol{\theta}) \mathbb{P}(\boldsymbol{\theta}) \quad (9)$$

186 encodes all information from model assumptions and experimental data used during model train-  
187 ing (see Methods). Our algorithm reconstructs the posterior (Fig. 3a) by sampling from it with the  
188 Hamiltonian Monte Carlo (HMC) method *Hoffman and Gelman (2014)*; *Betancourt (2017)* provided  
189 by the STAN software *Gelman et al. (2015)*.

### 190 **Benchmarking of the KF against REs**

191 For the synthetic time traces the KF samples from the posterior (Fig. 3a,b). For realistic channel  
192 numbers as  $10^3$  per patch, the posterior of the KF contains the true parameter values within the  
193 bounds of its 5th and 95th percentile (Fig. 3b). However, for typical experimental settings the  
194 total parameter error of the RE estimates *Moffatt (2007)*; *Milescu et al. (2005)*, calculated as the  
195 Euclidean distance to the true values, is roughly 10 times larger than the corresponding error of  
196 the posterior median of the KF to the true values. (Fig. 3c). It is noteworthy that, even for  $10^4$   
197 channels per patch, the precision of the KF is 4 times higher than that of the RE model on that data  
198 set. Dividing the error of all estimates from the REs approach for  $N_{\text{ch}} = 10^4$  by the error of the KF  
199 estimates for  $N_{\text{ch}} = 10^3$  gives a ratio  $0.97 \approx 1$ . This means that analysis of the same data with the  
200 KF yields an improvement of model quality that REs could only match with a tenfold increase in  
201 the numbers of channels analysed. This result confirms that the KF approach is superior to the RE  
202 approach as already discovered when comparing the two methods with current data alone *Moffatt*  
203 *(2007)*. For small  $N_{\text{ch}}$ , the ratio of the errors decreases like  $\sim 1/\sqrt{N_{\text{ch}}}$  (Fig. 3c). Thus the RE  
204 approach scales like  $\sim 1/N_{\text{ch}}$  and does not simply scale like the inverse square root of the system

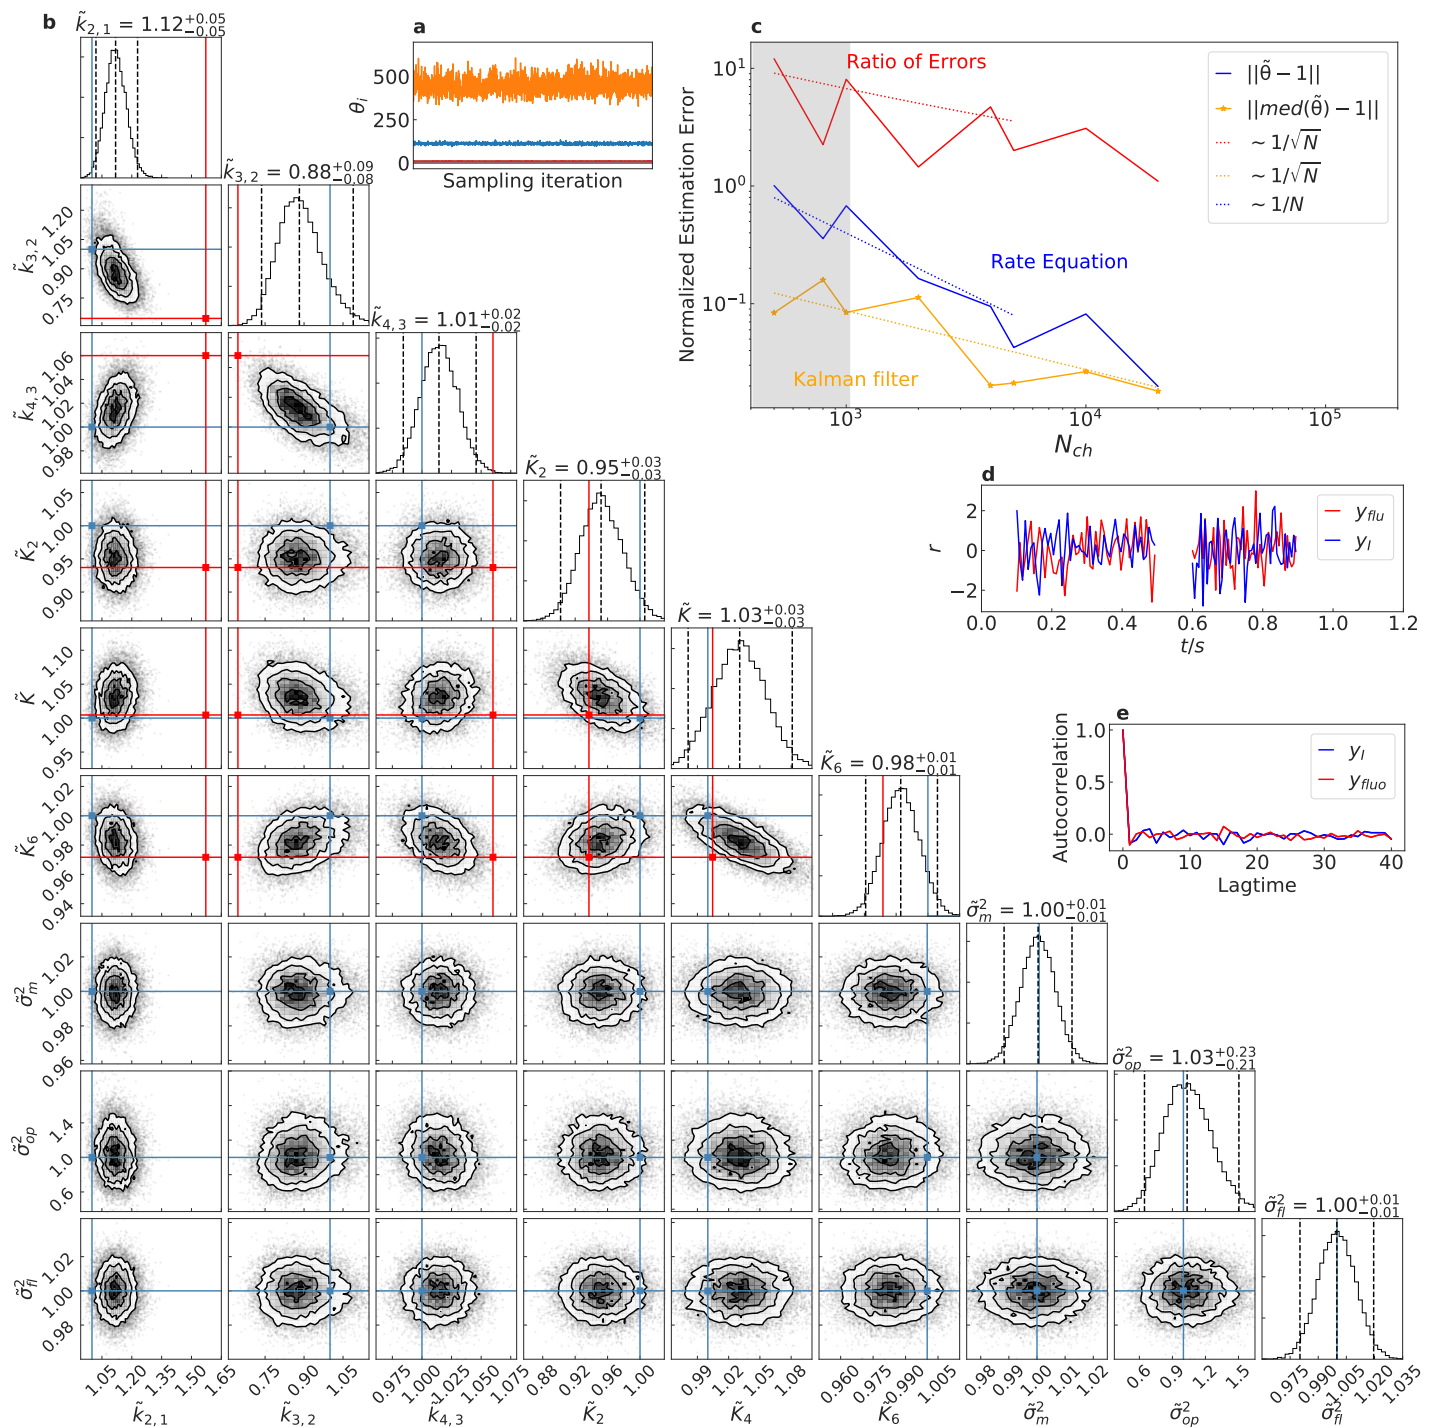

**Figure 3. Benchmark of the KF against least squares fitting of REs.** By  $\tilde{\theta}_i$  we indicate that the samples from the posterior are scaled by their true value. **a**, Sample traces of 3 representative parameters from the posterior distribution of the KF algorithm created by Hamiltonian Monte Carlo sampling. The posterior is constructed by those samples. **b**, Posterior distribution plotted against the point estimate of a least squares fit with REs for  $N_{ch} = 10^3$ . The blue lines represent the true values used for simulating the data, the red lines are their estimate from the RE fits. The dashed black lines show the quantiles (0.025, 0.5, 0.975) of the posterior. All values are normalized by their true value. Parameters which are not possible to infer from the mean values alone  $i$ ,  $N_{ch}$  and  $\lambda$  are used as fixed input parameters to make both approaches comparable. **c**, Absolute errors of the median for the rate and equilibrium constants obtained by the KF (orange) and from the REs (blue) are plotted against  $N_{ch}$ . Error ratio (red) between both approaches scales according to  $1/\sqrt{N_{ch}}$  at least for smaller  $N_{ch}$  which is the expected scaling since the intrinsic noise divided by the mean signal scales in the same way. One expects an asymptotic equivalence for large  $N_{ch}$  between KF and REs since the signal to noise ratio diverges. The typical experimental situation  $N_{ch} \propto 10^2 - 10^3$  is indicated by the area shaded in gray. **d**, Time trace of median of the normalized residuals  $r_{curr}$  (blue) and  $r_{fluo}$  (red) for one ligand concentration after analyzing with the KF. **e**, The autocorrelation function of  $r$  from the KF shows the expected white-noise process.

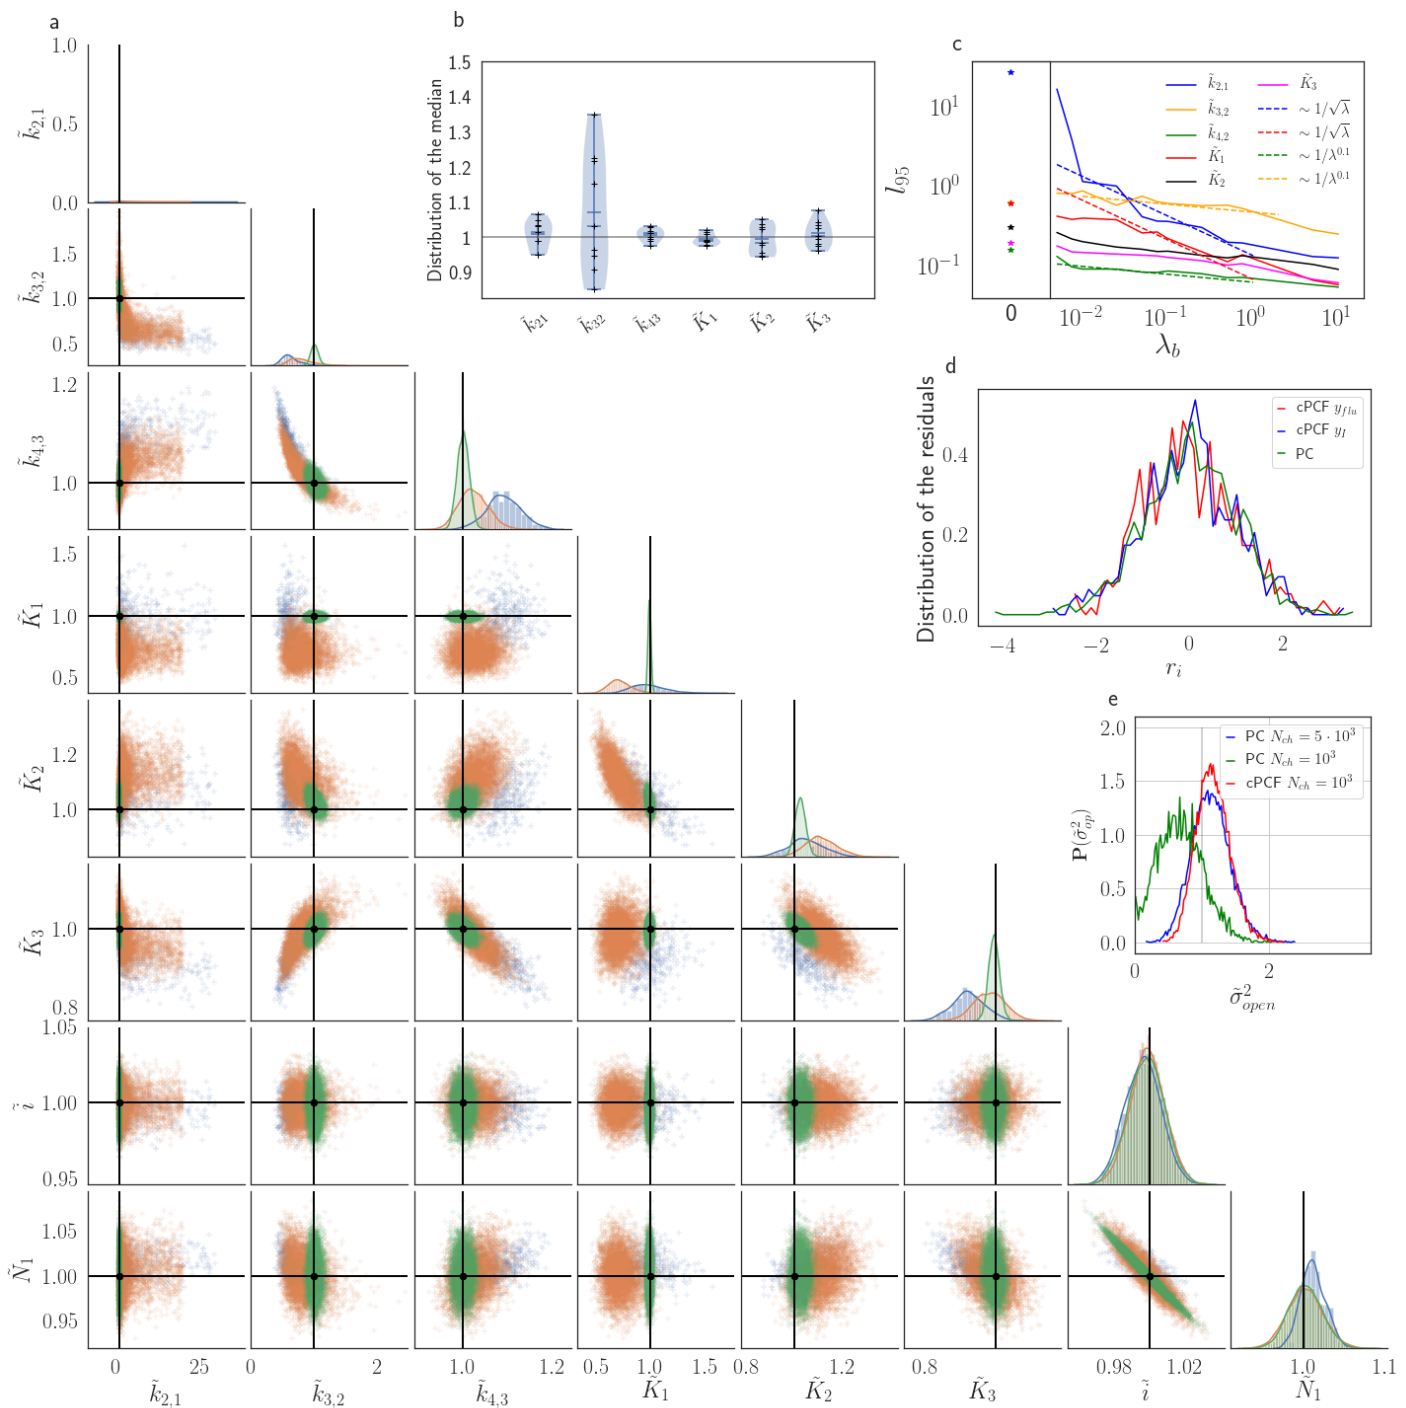

**Figure 4. Benchmark of the KF for patch-clamp versus patch-clamp fluorometry data.** **a**, Posteriors of PC data (blue), cPCF data with  $\lambda_b = 0.00375$  (orange) and cPCF data with  $\lambda_b = 0.375$  (green) but accounting for the superimposing fluorescence of unbound ligands in solution. The black lines represent the true values of the simulated data. The posteriors for cPCF  $\mathbb{P}(k_{2,1}, k_{3,2})$  are centered around the true values that are hardly visible on the scale of the posterior for the PC data. **b**, Distribution of the absolute error of the median for the parameters of the rate matrix for 9 different data sets, with  $\lambda_b = 0.375$  and superimposing bulk signal **c**, The 95th percentile of the marginalized posteriors vs.  $\lambda_b$  normalised by the true value of each parameter. A regime with  $l_{95} \sim 1/\sqrt{\lambda}$  is shown for  $k_{2,1}$  and  $K_1$ , while other parameters show a weaker dependency on the ligand brightness. **d**, Histograms of the residuals  $r$  of cPCF with  $\lambda_b = 2.5 \cdot 10^{-3}$  data and PC data. The randomness of the normalized residuals of the cPCF or PC data are well described by  $r_i \sim \text{normal}(0, \sigma_{\text{res}}^2 = 1)$ . The estimated variance is  $\sigma_{\text{res}}^2 = 0.98 + 0.26$ . Note that the fluorescence signal per frame of is very low such that it is skewed. **e**, Posterior of the open-channel noise  $\mathbb{P}(\sigma_{\text{op}}^2 / \sigma_{\text{op, true}}^2)$  for PC data with  $N_{\text{ch}} \cdot 10^3$  (green) and  $N_{\text{ch}} \cdot 10^5$  (blue) as well as for cPCF data with  $N_{\text{ch}} \cdot 10^3$  (red) with  $\lambda_b = 0.375$ . Adding fluorescence data is roughly equal to five times more ion channels to estimate  $\sigma_{\text{op}}^2$ . We assumed as prior for the instrumental variance  $\mathbb{P}(\sigma^2) = \mathcal{N}(1, 0.01)$ .



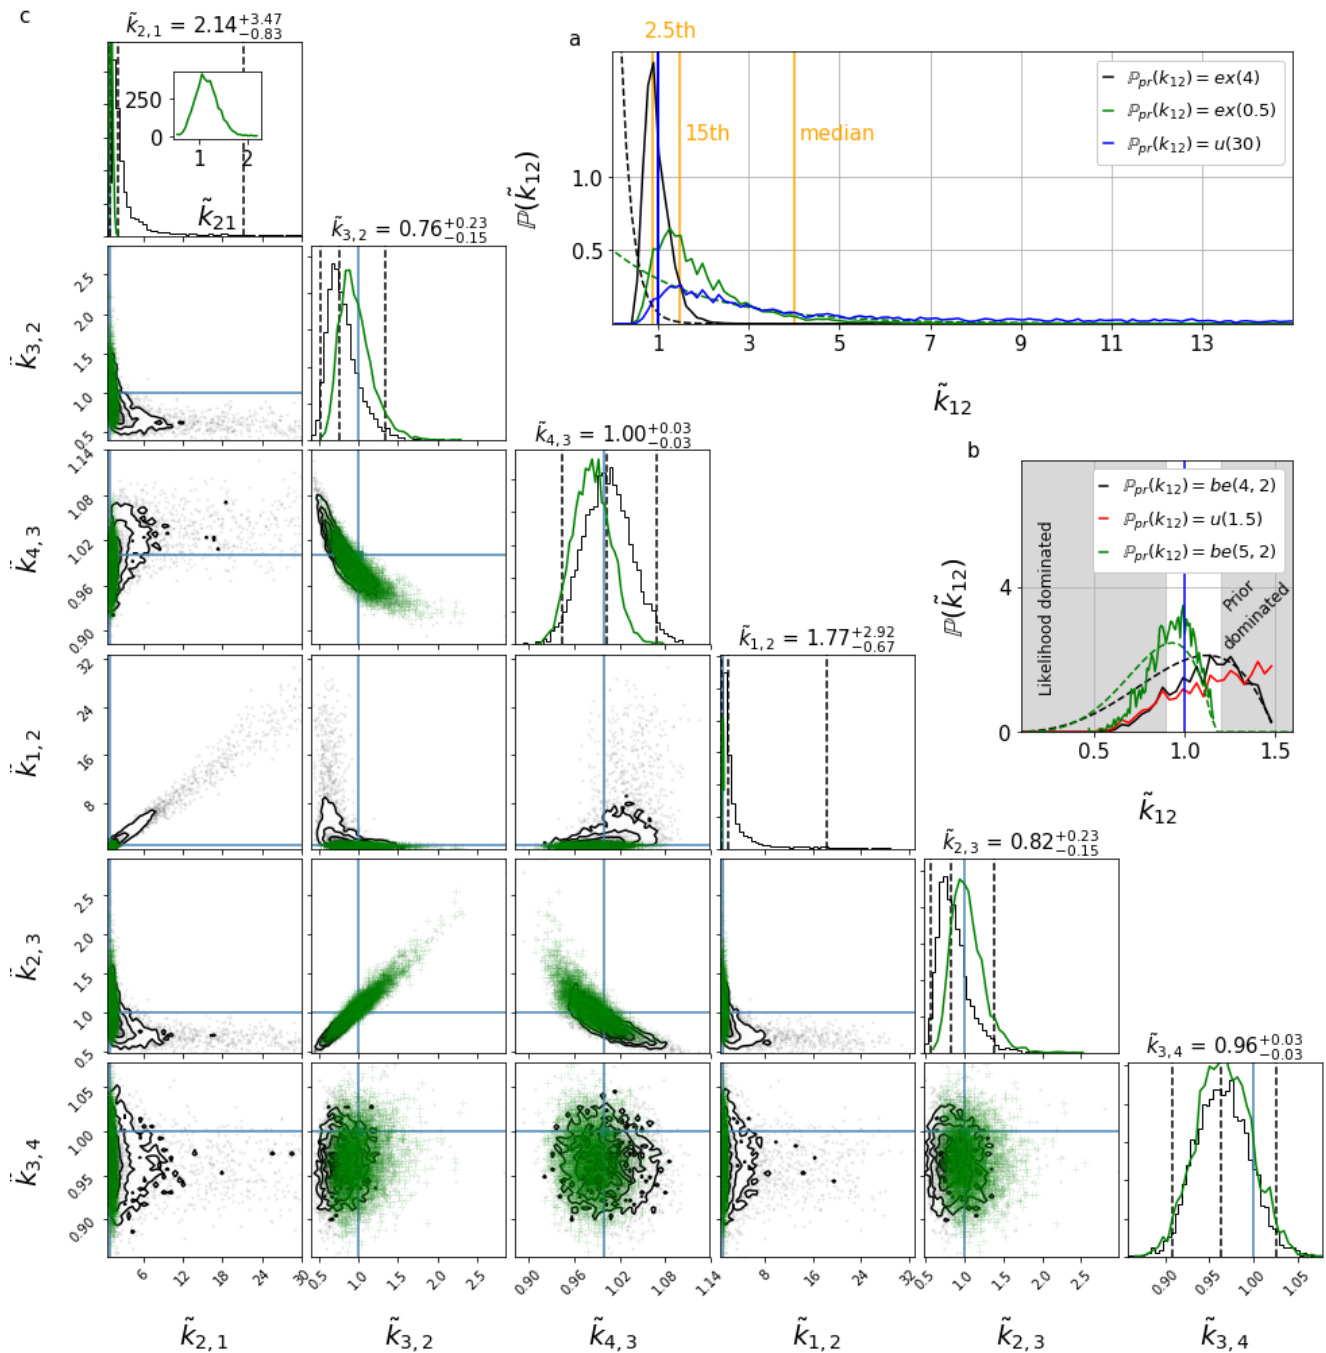

**Figure 5. Variations of the posterior under different prior assumptions** All posterior samples of  $\theta_i$  are plotted scaled by their true values as  $\tilde{\theta}_i$ . True values are indicated by blue lines. The vertical orange lines represent the median and 2.5 and 15-percentile. **a**, Posterior  $\mathbb{P}(k_{1,2})$  of the PC data from  $M_{\text{true}}$  as used throughout this article. Posterior derived from different priors. The priors are indicated by dashed curves. The uniform prior leads to a heavy tail in the posterior (blue). Note that the 97.5-percentile is at  $\tilde{k}_{1,2} = 28.9$  and the median is at  $\tilde{k}_{1,2} = 4$ . In contrast, the exponential tails of the other priors dominate their posteriors in the tails. Even if we set the prior mean value 4 times smaller than the true rate (black dashed curve), the posterior (black) is still better centered around the true value than the posterior with the uniform prior. **b**, Since  $k_{1,2}$  describes the ligand binding, theoretical predictions of a diffusion-limited binding rate can be used as a maximum in an informative prior. A beta distribution as the prior can be tuned  $\frac{k_{1,2}}{1800} \cdot s\mu M = \tilde{k}_{1,2} \sim \text{beta}(4, 2)$  to favor ligand binding between  $\tilde{k}_{1,2} \in [0.6, 1.4]$  (black, dashed curve). This results in a posterior which is likelihood-dominated below  $\tilde{k}_{1,2} = 0.9$  while it is dominated by the prior above  $\tilde{k}_{1,2} = 1.1$ . A uniform prior with the same support as the beta prior results in a posterior with more weight above the theoretical possible range (red), where it is prior dominated. Thus, the difference between black and red posteriors indicates the information which is added by the beta prior. In this case it penalizes too high values and pushes the probability mass towards the true value. A stricter beta distribution  $\frac{k_{1,2}}{1400} \cdot s\mu M = \tilde{k}_{1,2} \sim \text{beta}(5, 2)$  results in a narrower posterior (green). The Bayesian update concentrates for both priors the posterior mass towards the true value. **c**, The consequence of the more informative beta prior (green dashed line in b) on the posterior of the complete rate matrix. Green dots result from this prior, black lines are from a uniform prior  $u(30)$ . The inset zooms onto the collapsed posterior.

205 size, as one might assume. In Fig. 3d, the normalized residuals of one time trace are shown  
 206 which are defined as

$$r_i := \frac{y_i - (\mathbf{HE}[\mathbf{n}])_i}{\sqrt{\text{var}[y_i]}}. \quad (10)$$

207 We normalize with respect to the predicted standard deviation for each data point  $\sqrt{\text{var}[y_i]}$  given  
 208 by the KF. If the synthetic data are fitted with the true model, one expects to find a white-noise  
 209 process for the residuals. Plots of the autocorrelation function of both signal components confirm  
 210 our expectation (Fig. 3e). The estimated autocorrelation vanishes after one multiple of the lag  
 211 time (the sampling interval), which means that the residuals are indeed a white-noise process.  
 212 Estimating the residuals from RE would lead to correlated residuals *Moffatt (2007)*, which is one  
 213 reason for less precise parameter estimates.

### 214 **cPCF versus patch clamp only**

215 To evaluate the advantage of cPCF data *Biskup et al. (2007)* with respect to PC data only (Fig. 4),  
 216 we compare different types of ligands: Idealized ligands with brightness  $\lambda_b$ , emitting light only  
 217 when bound to the channels, and 'real' ligands which also produce background fluorescence when  
 218 diffusing in the bath solution (Appendix 3). The increased precision for the dissociation rate of the  
 219 first ligand,  $k_{2,1}$ , is that strong that the variance of the posterior  $\mathbb{P}(k_{2,1}, k_{3,2})$  nearly vanishes in the  
 220 combined plot with the current data (nearly all probability mass is concentrated in a single point  
 221 in Fig. 4a). The effect on the error of the equilibrium constants  $K_i$  is less strong. Additionally, the  
 222 bias is reduced and even the estimation of  $N_{\text{ch}}$  is improved. The brighter the ligands are, the  
 223 more the posterior of the rates decorrelates, in particular  $\mathbb{P}(k_{2,1}, k_{3,2})$  (Fig. 4a). All median estimates  
 224 of nine different cPCF data sets (Fig. 4b) differ by less than a factor 1.1 from the true parameter  
 225 except  $k_{3,2}$ , which does not profit as much from the fluorescence data as  $k_{2,1}$  (Fig. 4c). The 95th  
 226 percentiles,  $l_{95}$  of  $\mathbb{P}(k_{2,1})$  and  $\mathbb{P}(K_1)$  follow  $l_{95} \sim 1/\sqrt{\lambda_b}$ . Thus, with increasing magnitude of ligand  
 227 brightness  $\lambda$ , the estimation of  $k_{2,1}$  becomes increasingly better compared to that of  $k_{3,2}$  (Fig. 4c).  
 228 The posterior of the binding and unbinding rates of the first ligand contracts with increasing  $\lambda_b$ . The  
 229  $l_{95}$  percentiles of other parameters exhibit a weaker dependency on the brightness ( $l_{95} \sim \lambda^{-0.1}$ ). For  
 230  $\lambda_b = 0.01$  photons per bound ligand and frame, which corresponds to a maximum mean signal of 20  
 231 photons per frame, the normal approximation to the Poisson noise hardly captures the asymmetry  
 232 of photon counting noise included in the time traces. Nevertheless,  $l_{95}$  decreases about ten times  
 233 when cPCF data are included (Fig. 4c). The estimated variance of  $r_i$  for PC or cPCF data is  $\sigma^2(r_i) \approx 1$   
 234 (Fig. 4d) which means that the modeling predicts the stochastic process correctly up to the variance  
 235 of the signal. Note that the mean value and covariance of the signal and the state form sufficient  
 236 statistics of the process, since all involved distributions are approximately multivariate normal.  
 237 The fat tails and skewness of  $\mathbb{P}(k_{2,1})$  and  $\mathbb{P}(k_{1,2})$  arises because the true model is too flexible for  
 238 current data without further prior information. Nevertheless, we show that for similar data sets the  
 239 true underlying process can still be determined (Fig. 6g and Fig. 7b). Remarkably, the KF allows to  
 240 determine in a macropatch the variance of the open-channel current noise for  $\sigma_{\text{op}} = 0.1i$ , i.e. when  
 241 the total noise is dominated by the much larger gating noise  $(\mathbf{HP}, \mathbf{H}^T)_{2,2}$  (Fig. 4e): For the saturating  
 242 ligand concentration  $p_{\text{o,max}} = 0.833$ , i.e. the expected open probability of the true process, the ratio  
 243 at equilibrium is

$$\frac{(\mathbf{HP}, \mathbf{H}^T)_{2,2}}{\sigma_{\text{op}}^2} \approx \frac{1 - p_{\text{o,max}}}{\sigma_{\text{op}}^2} \geq 20. \quad (11)$$

### 244 **Including theoretical limits and vague parameter knowledge into the analysis with** 245 **different priors**

246 One advantage of Bayesian statistics is that with prior distributions, one can account for partial  
 247 knowledge about parameters and their uncertainties. While it is straightforward to use the pos-  
 248 terior of a previous experiment as a prior for the data set, it is less obvious how to model notion  
 249 of the plausible magnitude of a parameter into a prior. Here we propose some usable options for

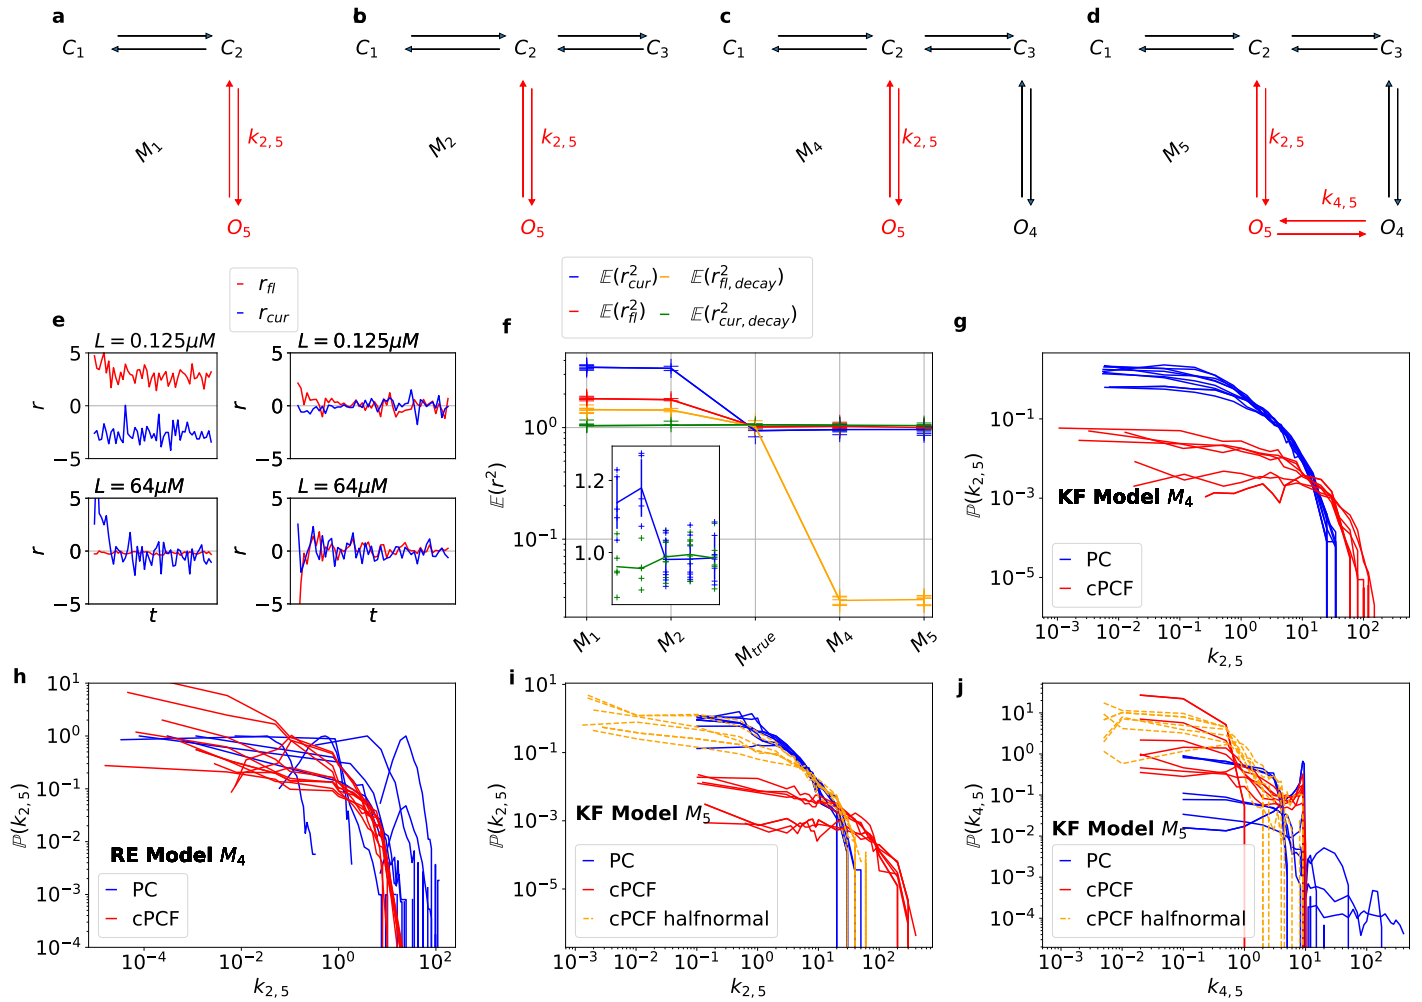

**Figure 6. Model selection by the second moment of the residuals and by continuous model expansion.** **a-d**, Model structures of the trained models differing from the true process (c.f. Fig. 1 a). Red states and transitions have no counterpart in the true model. All models are nested in the most complex model  $M_5$  (**d**). **e**, Time traces of residuals  $r$  of cPCF data from KF-fits for current data (blue) and fluorescence data (red) at two ligand concentrations  $L$  for the incorrect model  $M_2$ . Left: Jump to the ligand concentration. Right: Jump to zero. Systematic deviations from zero suggest that model  $M_2$  is too simple. **f**, Second non-centralized moment of the residuals for all models. For the true model the second non-centralized moment becomes the variance with  $\text{var}[r_i] = 1$  because  $\mathbb{E}[r_i] = 0$ . The inset shows the second non-centralized moment of PC data for the five different models on a linear scale. While underfitting can be clearly detected, overfitting is not detected. cPCF Data increase the contrast of current residuals between underfitting and true process by  $\approx 12.5$ . **g-j**, Continuous model expansion by model  $M_4$  and  $M_5$  from **c,d**. **g**, Posterior distribution  $\mathbb{P}(k_{2,5})$  for a rate into a state which does not exist in the true process obtained by the KF. For current data only, 10 out of 10 data sets maximise the probability density for  $k_{2,5} \rightarrow 0$ . For cPCF data, 9 out of 10 data sets yielded the same result and only one data set has a finite maximum. Hence, the KF suggests to delete  $O_5$ . **h**, Same current data (blue) analyzed with a RE approach finds in 4 out of 7 data sets rates into the non-existing state. Adding fluorescence data (red) improves the analysis. Now in 8 out of 10 data sets the posterior is maximized for  $k_{2,5} = 0$ . **i,j**, The KF for various PC and cPCF data sets reduces  $M_5$  to the true data-generating process  $M_{\text{true}}$  for most data sets by maximizing the posterior for a zero rate into  $O_5$ . For current only data 4 out of 7 data sets show this behavior. For cPCF 9 out of 10 data sets maximise  $\mathbb{P}(k_{2,5})$  for  $k_{2,5} \rightarrow 0$  and  $\mathbb{P}(k_{4,5})$  for  $k_{4,5} \rightarrow 0$ . Across  $M_4$  and  $M_5$  (**g** and **i**) the posteriors  $\mathbb{P}(k_{2,5})$  show a similar shape. **j**, For cPCF data there is no probability mass for  $k_{4,5} > 10$ . Hence, for  $k_{4,5}$  cPCF data constrain closer to zero than PC data but  $k_{2,5}$  it is reverse. The dashed red lines belong to the same cPCF data but with a weakly informative halfnormal prior  $k_{5,2} \sim \text{halfnormal}(0, 6 \cdot 10^3)$  for one specific rate which we identified to be not confined by the data. This prior also reduces the magnitude of the peak in  $k_{4,5}$  and thus suggests omitting state  $O_5$ .

250 prior distributions for  $k_{1,2}$  that are related to the maximum entropy principle using diffusion limited  
251 binding as example.  
252 Binding can not be faster than molecular encounters due to diffusion **Smoluchowski (1918)**. For  
253 the first binding step we used an approximation for small ligand receptor interactions **van Holde**  
254 **(2002)**  $k_{\text{binding}} = 600 \mu\text{M}^{-1}\text{s}^{-1}$ . Thus, for two available binding sites the stoichiometry increases the  
255 upper limit to  $k_{1,2} = 1,200 \mu\text{M}^{-1}\text{s}^{-1}$ . Here we investigate priors with different information content  
256 to model the *a priori* plausibility for  $k_{1,2}$  by making use of the mentioned diffusion limit. Traditional  
257 Bayesian or frequentist approaches, using uniform priors  $u(l) = \frac{1}{l}$  if  $k_{1,2} \in [0, l]$ , perform well for  
258 the “strong data case”. A uniform prior is a maximum entropy distribution under the condition  
259 that the only information available about the unknown rate is the interval of possible values, i.e.  
260 their support. A maximum entropy distribution adds the least information (is the most conserva-  
261 tive assumption) to the posterior apart from the explicitly used conditions, which is in this case the  
262 support **Jaynes (1957)**. In the strong data context, the posterior is dominated by the likelihood and  
263 the influence of the prior information is minor **van der Vaart (1998)**. In contrast, for modeling situa-  
264 tions with weakly informative data (Fig. 5 **a**) an educated prior selection influences the posterior to  
265 centre around the true values. For instance, the PC data are not informative enough to make the  
266 likelihood of  $k_{1,2}$  contract in a small neighbourhood around the true value (see Fig. 4). Due to the  
267 uniform prior the corresponding posterior behaves accordingly (Fig. 5 **a**). The data are only weakly  
268 informative because larger  $k_{1,2}$  can be partially compensated for by a larger  $k_{2,1}$  and a smaller  $k_{3,2}$   
269 (Fig. 5 **c**). Nevertheless, all probability mass of  $\mathbb{P}(k_{1,2})$  above the diffusion limit of binding (Fig. 5 **a**) is  
270 physically impossible, though plausibly given by the data, since the rates  $k_{1,2}$  and  $k_{2,3}$  are diffusion-  
271 limited or slower. Note that the estimated 15th-percentile is at  $\tilde{k}_{1,2} = 1.47$  such that more than 85%  
272 of the probability mass lies in a physically impossible area.  
273 The situation can be improved by supplying more plausible information about  $k_{1,2}$  using an expo-  
274 nential distribution

$$\mathbb{P}(k_{1,2}) = \zeta \cdot \exp(-\zeta k_{1,2}). \quad (12)$$

275 The parameter  $\zeta$  refers to the parameter which scales the statistics,  $\mathbb{E}[k_{1,2}] = 1/\zeta$  and  $\text{var}[k_{1,2}] = 1/\zeta^2$ .  
276 Notably, the exponential distribution is a maximum entropy distribution if two conditions are met  
277 **McElreath (2018)**. The parameter has to be positive and the mean of the parameter is known. On  
278 the one side the exponential prior succeeds in penalizing the heavy tails of the likelihood (Fig. 5 **b**).  
279 On the other side, even if we apply an exponential prior whose mean value is four times smaller  
280 than the true binding rates, the posterior (black) is still more concentrated around the true value  
281 than the posterior with the uniform prior.  
282 Nevertheless, the exponential distribution is not well suited for our problem because it does not  
283 incorporate a hard upper limit. Even with the exponential prior, there is always some probability  
284 mass in areas which are physically impossible and, additionally, the exponential prior does not  
285 include that the response of the ion channel proceeds in a limited amount of time which means  
286 that  $k_{1,2}$  and  $k_{2,3}$  cannot be arbitrarily small. Thus it is unlikely that the true  $k_{1,2}$ ,  $k_{2,3}$  are by orders  
287 of magnitude slower than the diffusion limit. In fact, the exponential prior states the opposite:  
288 binding rates have the highest probability density at zero.

289 The beta distribution

$$\text{be}(a, b) \frac{1}{B(a, b)} \theta^{a-1} (1 - \theta)^{b-1}, \quad (13)$$

290 where  $B(\cdot, \cdot)$  defines the beta function, is a maximum entropy distribution derived from three con-  
291 ditions: that the support is  $\theta_{1,2} \in [0, 1]$ , that

$$E[\ln(\theta_{1,2})] = \Psi(a) - \Psi(a + b) \quad (14)$$

292 and that

$$E[\ln(1 - \theta_{1,2})] = \Psi(b) - \Psi(a + b), \quad (15)$$

293 where  $\Psi(\cdot)$  symbolizes the digamma function. Since rescaling  $k_{1,2} = l\theta_{1,2}$  by  $l$  adds only a constant  
294 term to the entropy and the entropy is translation invariant, we remain in the maximum entropy

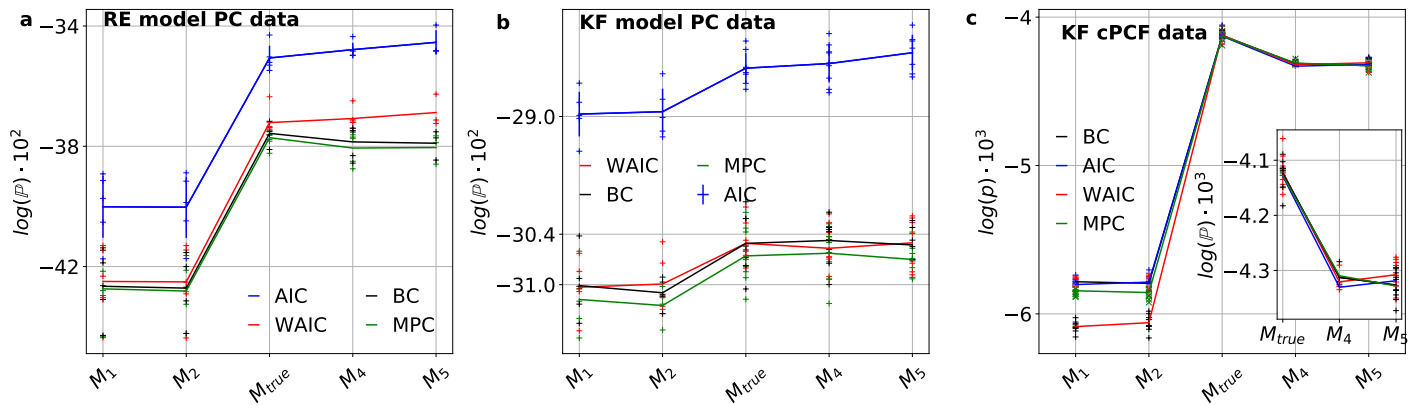

**Figure 7. Bayesian Model selection** Compared is the predictive accuracy of the indicated five models estimated by either the Akaike Information Criterion (AIC), the Widely Applicable Information Criterion (WAIC), Bayesian cross-validation (BC) or Maximum *a posteriori* cross-validation (MPC). We use BC on a single validation data set as an estimator of the predictive accuracy and evaluate the other criteria how they approximate BC. The solid lines represent the mean quality of the estimators over different data sets (crosses). **a**, Both information criteria fail to approximate the predictive accuracy if current-only data are modeled with deterministic REs. WAIC approximates the predictive accuracy better than AIC, though both information criteria suggest too complex models. Cross-validation (black and green) reveals the correct kinetic scheme. **b**, For current data analyzed with the KF, WAIC estimates the predictive accuracy obtained by Bayesian cross-validation (black) with high accuracy while AIC fails. WAIC predicts the BC value even better than MPC. **c**, Including the fluorescence, the difference in the predictive accuracy of the true model to the under-complex models increases strongly and all methods identify the right kinetic scheme. At the same time, the posterior has become multivariate normal by adding the second dimension to the data. Instead of an almost constant region in **b** for model  $M_{true}$  to  $M_5$ , there is a unique peak for model  $M_{true}$ . To identify this peak, we only needed to score the models by the data on the activation part of the time series. This is consistent with the observation of Fig. 6 **f** that the estimation of the decaying part of the fluorescence is very susceptible to overfitting. The residuals in the decaying part of the fluorescence data are smaller which results in a higher probability of those data points if fitted with  $M_4$  or  $M_5$ . We did not observe this result in PC data. Note that ligand association happens over different trajectories in the observation space but ligand dissociation relaxes after a quick transition of a few data points onto a single trajectory (Fig. 2b). There is less diverse information about the deactivation about the rates. The inset shows a part of the diagram at an extended ordinate.

295 setting for every set of  $a, b, l$ . Therefore, we use the beta distribution to model the prior plausibility  
 296 of  $k_{1,2} \in [0, l]$  by setting hard constraints: positive but smaller than  $l$ . We then distribute the proba-  
 297 bility mass with respect to the vague idea of where to expect the binding rate within this interval.  
 298 Thereby, we implicitly assume the conditions from above.  $\tilde{k}_{1,2} := k_{1,2}/1,800 \cdot s\mu M \sim \text{beta}(4, 2)$  con-  
 299 strains the posterior such that  $k_{1,2}$  cannot be larger than  $1800 \cdot s^{-1}\mu M^{-1}$  and we expect  $k_{1,2}$  to be  
 300 between  $700 \cdot s^{-1}\mu M^{-1}$  and  $1,700 \cdot s^{-1}\mu M^{-1}$ . Even though this beta prior (Fig. 5 **b**) is an informative  
 301 prior, a lot of the information derives from the support of the beta distribution as revealed by com-  
 302 parison for  $\tilde{k}_{1,2} < 0.9$  with the posterior obtained with the uniform prior having the same support. In  
 303 this unconstrained area the data are really informative. In contrast, for  $\tilde{k}_{1,2} > 1$  the prior is the most  
 304 important source of information for the posterior. For the green posterior (Fig. 5 **b-c**) we assume a  
 305 little bit stricter limits and plausibility within the possible interval.  $k_{1,2}/1,400 \cdot s\mu M \sim \text{beta}(5, 2)$ . The  
 306 data support the *a priori* plausibility assumptions by concentrating the posterior within the area  
 307 which contains most probability mass of the prior (Fig. 5 **b**). Note, that for the other rates (which  
 308 have not been constrained by an informative prior), the beta prior for  $k_{1,2}$  improves their parameter  
 309 inference by concentrating the posterior (Fig. 5 **c**) around the true values. That effect is strongest  
 310 for  $k_{2,1}$  due to the strong correlation with  $k_{1,2}$  induced by the likelihood. The posterior has now  
 311 areas in the parameter space which are strongly influenced by the shape of the beta distribution  
 312 whereas other areas are shaped by the likelihood. Remarkably, despite some arbitrariness of the  
 313 shape of the beta prior, it provides profit for the inference of all ligand-related rates. Furthermore,  
 314 the restricted range speeds up sampling and thus reduces the computation time.

315 **Bayesian Model selection by continuous model expansion or predictive accuracy**  
316 We compare three methods of model selection: continuous model expansion, the statistics of  $r(t)$ ,  
317 and the predictive accuracy estimated either by cross-validation or information criteria on a set of  
318 candidate models  $M_1, M_2, M_{\text{true}}, M_4, M_5$  (Fig. 6a-d).  
319 The KF enables to identify underfitting better by plotting the residuals  $r(t)$  (Fig. 6e) rather than sig-  
320 nal time traces because the large amplitude changes of the mean current obscures the relatively  
321 small amplitude of the systematic errors. The estimated second moment of  $r(t)$  is plotted for the  
322 different models (Fig. 6f). For the true model  $M_{\text{true}}$  the estimated second moment equals the vari-  
323 ance and, since we normalized the residual traces, the second non-centralized moment should be  
324 close to 1. In fact all variance is explained by  $M_{\text{true}}$ . Overfitting models  $M_4$  and  $M_5$  are detected  
325 by the decrease of the fluorescence variance in the decaying part of the traces. For PC data only,  
326 underfitting can be detected. But as long as the modeler looks out for the simplest model which  
327 does not underfit the detection of the true process is successful.  
328 The conceptual idea of continuous model expansion is to sample from a model structure which  
329 contains the true process and a lot of additional model structure whose rates are set to zero by  
330 the algorithm when the data quality or quantity increases. In other words one assumes a complex  
331 super model  $M_5$  which includes all simpler models as a limiting case  $k_{i,j} \rightarrow 0$ . A simpler model can  
332 be chosen if the posterior has a distinctive maximum for  $k_{i,j} = 0$ . Testing continuous model ex-  
333 pansion by  $M_4$  with the KF, the posterior for only one out of ten data sets shows a local maximum  
334 for  $k_{2,5} \neq 0$  (Fig. 6g). Thus, the KF switches off non-existing states for most data sets. By contrast,  
335 the corresponding analysis of current-only data by REs reveals a peaking posterior for  $k_{2,5} \neq 0$  in  
336 several cases (Fig. 6h). Additional fluorescence data reduce the occurrence of those peaks.  
337 If the PC or cPCF data are fitted with model  $M_5$  by using the KF, for most data sets the rates into  $O_5$   
338 maximize the posterior if they vanish (Fig. 6i-j). For PC data, the posterior reveals multi-modality  
339 with some data sets (Fig. 6j). Hence, point estimates of the parameters are not reliable while the  
340 posterior of  $M_5$  encodes all model uncertainties. Notably, this multimodality occurs also for cPCF  
341 data though less pronounced. Thus, both experiments share the tendency to create a finite peak  
342 around  $k_{4,5} = 10$ , indicating the false detection of an additional open state if not analyzed with cau-  
343 tion.  
344 Applying a weakly informative prior distribution supports the model determination in the contin-  
345 uous model expansion case. The advantage of continuous model expansion is that it reduces the  
346 risk of finding a local optimum on the discrete model space rather than a global optimum by trans-  
347 lating the model space from a discrete to continuous model space. The disadvantage of having a  
348 lot of possible structure in the model makes the model quickly too flexible to come to a conclusive  
349 posterior with a limited amount of data. Many parameter sets can fit the data roughly equally likely.  
350 Thus, prior distributions are needed to support the algorithm to select simpler base models, which  
351 means concentrating for certain  $k_{i,j}$  the posterior around zero *Gelman et al. (2017)*. To exemplify  
352 this, we use a weakly informative prior distribution on  $k_{5,2}$  (see Appendix 1) to show how prior in-  
353 formation alleviates model pathology due to excessive model flexibility. Heuristically, one should  
354 be sceptical about rates which are faster than the sampling frequency because they could gener-  
355 ate eigenvalues  $\lambda$  *Sakmann (2013)* of the rate matrix, which are smaller than the time between  
356 two sampling points. Here we used a sampling frequency of 10 kHz. The frequency by which the  
357 KF analysed the data ranged from 83.3 Hz to 500 Hz depending on the kinetics. The weakly infor-  
358 mative half-normal prior  $k_{5,2} \sim \text{half-normal}(0, 6 \cdot 10^3)$ , which penalizes unrealistic high rates of  $k_{5,2}$ ,  
359 is necessary because the data are not able to constrain that rate. Applying this prior distribution  
360 suppresses secondary peaks and probability mass in the distribution tails of the other rates  $k_{2,5}$   
361 and  $k_{4,5}$ . This further emphasizes to leave out  $O_5$  in the final model (Fig. i-j).  
362 We use this prior to argue that one loses a lot of descriptive power of a data set if one tries to be  
363 objective by using uniform priors in particular with unrealistic large intervals. The notion of being  
364 unbiased with a flat prior, where the likelihood does not dominate the prior, ends up in paradoxes

365 **Zwickl and Holder (2004)**. A uniform prior on chemical rates leads to a non-uniform prior on the  
366 activation energies in the free energy landscape of the protein or any chemical reaction. Hence,  
367 the weakly informative prior acts as a guard against overfitting by suppressing fast rates beyond  
368 the experimental time resolution.

369 Notably, continuous model expansion fits many candidate models in one attempt with the exhaus-  
370 tive supermodel. This technique reduces the risk of getting into an impasse in a local optimum  
371 in the model space. Nevertheless, one should drop from the supermodel step by step the parts  
372 which are switched off and then refit. Optimally, this process should be accompanied by the esti-  
373 mation of the predictive accuracy **Gelman et al. (2014)**. In particular in ambiguous situations with  
374 either multi-modality in the posterior or no clear maximum in the probability density at  $k_{i,j} = 0$  the  
375 predictive accuracy is a well defined criterion.

376 Several other statistical approaches to identify the best fitting model have been reported **Vehtari**  
377 **et al. (2012)**; **Piironen and Vehtari (2017)**; **McElreath (2018)**; **Wallace (2005)**. Those approaches bal-  
378 ance accuracy of the model's predictions with its simplicity. Note, the "simplicity" of a model is  
379 ultimately subjective because it depends on the choice of the (formal) language in which a model  
380 is described. **Wallace (2005)** Some of them, such as Maximum evidence or BIC, **Vehtari et al. (2012)**  
381 rely on the assumption that the true data-generating process is included in the set of models to be  
382 tested. This is called the M-closed situation **Vehtari et al. (2012)**. These approaches perform well  
383 in simulation studies **Bronson et al. (2009)** if one is in fact in an M-closed setting.

384 Generally, when selecting a kinetic scheme for a protein, one reduces the high-dimensional con-  
385 tinuous dynamics of the true data-generating process  $\mathbb{F}(y)$  to a few discrete states and transition  
386 rates. The true data-generating process is therefore not included in the set of models from which  
387 the best fitting model is chosen which is the M-open setting **Vehtari and Ojanen (2012)**. For this  
388 setting we define the best fitting model as the model which loses the least information, or adds  
389 the least entropy, if it is used as a proxy for  $\mathbb{F}(y)$ . In this way we are able to rank all models by  
390 their information loss. The information loss (or the increase of entropy) incurred by approximat-  
391 ing one probability distribution (the true data-generating process) by another (the model) can be  
392 measured by the Kullback-Leibler divergence **McElreath (2018)** which is in principle not accessible.  
393 But the model with the minimum Kullback-Leibler divergence within a set of candidate models can  
394 be found asymptotically by maximizing the predictive accuracy **Burnham and Anderson (2004)**; **Gel-**  
395 **man et al. (2014)**. The predictive accuracy for a specific data set  $\tilde{\mathcal{Y}} = \{\tilde{y}_1, \dots, \tilde{y}_{N_{\text{data}}}\}$ , which has not  
396 been used for model training **Gelman et al. (2014)**, is defined as

$$\log \mathbb{P}_{\text{pred}}(\tilde{\mathcal{Y}}) = \log \mathbb{E}_{\theta}[\mathbb{L}(\tilde{\mathcal{Y}}|\theta)] \quad (16)$$

397 where  $\mathbb{E}_{\theta}[\mathbb{L}(\tilde{\mathcal{Y}}|\theta)] = \int \mathbb{L}(\tilde{\mathcal{Y}}|\theta)\mathbb{P}(\theta|\mathcal{Y})d\theta$  means the average with regard to the posterior distribution.  
398 The mean predictive accuracy of a model for all possible data sets is the average over the unknown  
399 true data-generating process  $\mathbb{F}(\tilde{y}, t)$

$$\mathbb{E}_{\mathbb{F}}[\log \mathbb{P}_{\text{pred}}(\tilde{\mathcal{Y}})] = \int \log \mathbb{P}_{\text{pred}}(\tilde{\mathcal{Y}})\mathbb{F}(\tilde{\mathcal{Y}}) \prod_{i=1}^{N_{\text{data}}} d\tilde{y}_i \quad (17)$$

400 Maximizing Eq. 17 is equivalent to minimizing the Kullback-Leibler distance which specifies the  
401 information loss when approximating the unknown  $\mathbb{F}(y)$  by a model **Kullback and Leibler (1951)**;  
402 **Burnham and Anderson (2004)**. Because  $\mathbb{F}(y)$  is unknown, one has to estimate Eq. 17 by using the  
403 available samples from  $\mathbb{F}(y)$ . Therefore, different estimators of Eq. 17 are compared: AIC, WAIC,  
404 maximum *a posteriori* cross-validation and Bayesian cross-validation (see Methods). As a result, if  
405 current time series are modeled with REs, both information criteria fail to detect the overfitting  
406 model (Fig. 7a). This means, ignoring intrinsic fluctuations of macroscopic data, such as RE ap-  
407 proaches do, leads to the inference of more states than present in the true model if the model  
408 performance is evaluated by the training data. One can exploit this weakness by choosing the ki-  
409 netic scheme on cross-validated data, since too complex models derived from RE do not generalise  
410 as good to new data as a parsimonious model. Their additional states do not contribute positively

411 to the predictive accuracy of the model.  
412 As expected from theory, WAIC *Watanabe (2010)* succeeds (Fig. 7b) while AIC fails to estimate the  
413 predictive accuracy distribution. It suggests a better predictive accuracy with more complex model  
414 structures (Fig. 7b). The failing AIC correlates with the occurrence of a non-normal posterior dis-  
415 tribution *Watanabe (2007)*(see, Methods). The mean predictive accuracy of WAIC and BC (black  
416 and red) for  $M_4$  and  $M_5$  is only slightly smaller than that for  $M_{\text{true}}$  which can be explained by the  
417 observation that the KF automatically finds a sharp peak at  $\mathbb{P}(k_{2,5} = 0)$  (Fig. 6g-j). This can be used  
418 as a model selection strategy: If two models have a similar predictive accuracy and are nested one  
419 should check whether the posterior of the larger model switches off certain rates. The predictive  
420 accuracy not only scores a kinetic scheme. It also evaluates how closely the whole algorithm mim-  
421 ics the true process. Comparing the predictive accuracy of the true kinetic scheme  $M_{\text{true}}$  in (Fig. 7a  
422 and b) reveals the higher precision of the KF in modeling the intrinsic noise compared to the RE ap-  
423 proach. For multidimensional cPCF data all methods yield similar predictive accuracies and select  
424 the true data-generating process (Fig. 7c), as a unique peak for the true process is observed for all  
425 data sets.

## 426 Conclusion

427 We derived the prediction (Methods Eq. 33 and 34d), the output statistics (Methods Eq. 53) and  
428 correction equations (Appendix 4) of the KF for analyzing the gating and binding dynamics of ion  
429 channels including open-channel noise, photon-counting noise and background noise. For the  
430 correct kinetic scheme the parameter estimates obtained by the KF are  $\sim 10$  times as good when  
431 applied to the same data set (Fig. 3b,e). Furthermore, enriching the data by fluorescence based  
432 ligand binding increases the accuracy of the parameter estimates up to  $\sim 10^2$ -fold (Fig. 4a,c). In  
433 the case of weakly informative data we show the superiority of informative priors to constrain the  
434 posterior to physically reasonable values. In this case the interaction between data and the prior  
435 information enables a much more meaningful model inference (Fig. 5a-d) compared to using flat  
436 priors. Moreover, we showed that overfitting can be detected by continuous model expansion  
437 (Fig. 6g-i). Usually the KF maximizes its posterior by abolishing a rate into a non-existing state.  
438 This is not the case if the current time traces are analyzed by REs (Fig. 6h). The potential weakly  
439 informative prior on one critical rate which increases the accuracy of continuous model expansion  
440 approach (Fig. 6i-j). We demonstrated that the information criterion WAIC performs much better  
441 in approximating the predictive accuracy than traditional information criteria based on point esti-  
442 mates such as AIC (Fig. 7b). We are even able to predict the correct kinetic network in cases were  
443 the data are insufficient for creating a multivariate normal posterior (Fig. 7b). Another relevant  
444 aspect is that both information criteria fail to predict the true kinetic scheme if the data are ana-  
445 lyzed by deterministic REs (Fig. 7a). To select a model, one should apply WAIC and BC to multiple  
446 data sets, considering their dependency on noisy data. For the RE approach, only cross-validation  
447 revealed the true data-generating process. Model selection of kinetic schemes should not be done  
448 on training data if the analysis has been done by REs. For cPCF data we could detect the true ki-  
449 netic scheme with the second moment of the residuals. For the true model the empirical  $r(t)$  are  
450 close to the expected variance  $\text{var}(r) = 1$  and overfitting is revealed distinctively by the variance  
451 of the fluorescence signal (Fig. 6f) given the noise sources are quantitatively described. Together  
452 this demonstrates the potential of a full Bayesian treatment of the state estimation, parameter es-  
453 timation and model selection. This approach maximises the amount of information inferred from  
454 stochastic time-courses. While developed for PC/cPCF data our approach is applicable to all time  
455 courses where the intrinsic noise of the studied system is governed by a first order kinetic scheme  
456 and the measuring apparatus can be quantitatively described.



## 457 **Materials**

458 The state evolution  $s(t)$  of each individual channel in the patch was sampled with the Gillespie  
459 algorithm. *Gillespie Daniel T. (1977)* Then, traces were summed up, defining the ensemble state  
460 vector  $\mathbf{n}(t) := (n_1, n_2, n_3, n_4)^T$ , which counts the number of channels in each state.

## 461 **Methods**

462 In the Methods section we derive the equations for our Bayesian network for time series analysis  
463 of ion channels which are applicable for all linear chemical reaction networks (kinetic schemes). A  
464 detailed description of the experimental noise is provided in Appendix.

### 465 **The relation of Bayesian statistics to the Kalman filter**

466 The following conventions are generally used: Bold symbols are used for multi-dimensional ob-  
467 jects such as vectors or matrices. Calligraphic letters are used for (some) vectorial time series  
468 and double-strike letters are used for probabilities and probability densities. Within the Bayesian  
469 paradigm *Hines (2015); Ball (2016)*, each unknown quantity, including model parameters  $\theta$  and time  
470 series of occupancies of hidden states  $\mathfrak{N}_T = \{\mathbf{n}(t_i)\}_{i=1}^T$ , are treated as random variables conditioned  
471 on observed time series data  $\mathcal{Y}_T = \{\mathbf{y}(t_i)\}_{i=1}^T$ . The prior  $\mathbb{P}(\theta) = \prod_j^{N_{\text{par}}} \mathbb{P}(\theta_j)$  or posterior distribution  
472  $\mathbb{P}(\theta|\mathcal{Y}_T)$  encodes the available information about the parameter values before and after analysing  
473 the data, respectively. According to the Bayesian theorem the posterior distribution

$$\mathbb{P}(\theta|\mathcal{Y}_T) = \frac{1}{Z(\mathcal{Y}_T)} \mathbb{L}(\mathcal{Y}_T|\theta) \prod_j^{N_{\text{par}}} \mathbb{P}(\theta_j) \quad (18)$$

474 is a probability distribution of a parameter set  $\theta$  conditioned on  $\mathcal{Y}_T$ . The likelihood  $\mathbb{L}(\mathcal{Y}_T|\theta)$  encodes  
475 the distribution of the data by modelling the intrinsic fluctuations of the protein as well as noise  
476 coming from the experimental devices. The prior provides either assumptions before measuring  
477 data or what has been learnt from previous experiments about  $\theta$  (see Methods). The normalization  
478 constant

$$Z(\mathcal{Y}_T) = \int \mathbb{L}(\mathcal{Y}_T|\theta) \mathbb{P}(\theta) d\theta \quad (19)$$

479 ensures that the posterior is a normalized distribution. The KF is a special class of models in the  
480 family of Bayesian networks *Ghahramani (1997)*, which is a generalisation of the classical KF. Due  
481 to its linear time evolution (Eq. 1) the KF is particularly useful for modeling time series data of  
482 ensembles dynamics of first order chemical networks. It delivers a set of recursive algebraic equa-  
483 tions (Methods Eq. 28 and Eq. 32) for each time point, which allows to express the prior  $\mathbb{P}(\mathbf{n}(t)|\mathcal{Y}_{t-1})$   
484 and (after incorporating  $\mathbf{y}(t)$ ) the posterior  $\mathbb{P}(\mathbf{n}(t)|\mathcal{Y}_t)$  occupancies of hidden states  $\mathbf{n}(t)$  for all  $t$  given  
485 a set of parameters  $\theta$ . This means the KF solves the filtering problem (inference of  $\mathfrak{N}_T$ ) by explicitly  
486 modeling the time evolution of  $\mathbf{n}(t)$  by multivariate normal distributions. This allows us to replace  
487  $\mathbb{L}(\mathcal{Y}_T|\theta)$  of Eq. 18 by the expression of Eq. 8.

488 The Bayesian framework (as demonstrated in this article) has various properties which makes it  
489 superior to maximum likelihood estimation (MLE) *McElreath (2018)*. Those properties are in partic-  
490 ular useful for the analysis of biophysical data since very often the dynamics of interest are hidden  
491 or latent in the data. Models with a hidden structure are called singular. Consider for example  
492 the type of data investigated in this study which probes the protein dynamics by current and light.  
493 Singularity means that the Fisher information matrix of a model is not invertible leading to the  
494 breakdown of the Cramer-Roa Bound theorem. Due to the breakdown, it cannot be guaranteed  
495 that even in the asymptotic limit the log-likelihood function can be approximated by a quadratic  
496 form *Watanabe (2007)*. Thus, usually the MLE is not normally distributed. Consequently, the pos-  
497 terior distribution is usually not a normal distribution either *Watanabe (2007)*.

498 Using the full posterior distribution without further approximations detects the resulting problems  
499 such as deviation from normality or non-identifiability of parameters, related to the singularity. In

500 conclusion, the posterior is still a valid representation of parameter plausibility while maximum  
501 likelihood fails.

### 502 **Time evolution of a Markov Model for a single channel**

503 In the following, we write the time  $t$  as function argument rather than a subscript. Following stan-  
504 dard approaches, we attribute to each state of the Markov model an element of a vector space with  
505 dimension  $M$ . At a time, a channel can only be in a single state. This implies that the set of possible  
506 states is  $S := \{(1, 0, 0, \dots), (0, 1, 0, \dots), \dots, (\dots, 0, 1)\} \subset \{0, 1\}^M$ . In the following, Greek subscripts refer  
507 to different states while Latin subscripts refer to different channels. By  $\mathbf{s}(t) = \mathbf{e}_\alpha$  we specify that  
508 the channel is in state  $\alpha$  at time  $t$ . Mathematically,  $\mathbf{e}_\alpha$  stands for the  $\alpha$ -th canonical unit Cartesian  
509 vector.

510 Assuming that the state transitions can be modeled by a first order Markov process, the path prob-  
511 ability can be decomposed as the product of conditional probabilities as follows:

$$\mathbb{P}(\text{path}) = \mathbb{P}(\mathbf{s}(0), \mathbf{s}(1), \dots, \mathbf{s}(T)) = \mathbb{P}(\mathbf{s}(0)) \cdot \mathbb{P}(\mathbf{s}(1) | \mathbf{s}(0)) \cdot \mathbb{P}(\mathbf{s}(2) | \mathbf{s}(1)) \cdots \mathbb{P}(\mathbf{s}(T) | \mathbf{s}(T-1)). \quad (20)$$

512 Markov models (MMs) and rate models are widely used for modeling molecular kinetics (Appendix  
513 Sec. 2). They provide an interpretation of the data in terms of a set of conformational states and the  
514 transition rates between these states. For exactness it remains indispensable to model the dynam-  
515 ics with a HMMs *Noé et al. (2013a)*. The core of a hidden Markov model is a conventional Markov  
516 model, which is supplemented with a an additional observation model. We will therefore first fo-  
517 cus on a conventional Markov model. State-to-state transitions can be equivalently described with  
518 a transition matrix  $\mathbf{T}$  in discrete time or with a rate matrix  $\mathbf{K}$  in continuous time, as follows:

$$\mathbf{T}_{\alpha,\beta} := \mathbb{P}(\mathbf{s}(t+1) = \mathbf{e}_\alpha | \mathbf{s}(t) = \mathbf{e}_\beta) = \exp(\mathbf{K} \cdot \Delta t)_{\alpha,\beta}, \quad (21)$$

519 where  $\exp$  is the matrix exponential. We aim to infer the elements of the rate matrix  $\mathbf{K}$ , constituting  
520 a kinetic model or reaction network of the channel. Realizations of sequences of states can be  
521 produced by the Doob-Gillespie algorithm *Gillespie Daniel T. (1977)*. To derive succinct equations  
522 for the stochastic dynamics of a system, is it beneficial to consider the time propagation of an  
523 ensemble of virtual system copies. This allows to ascribe a probability vector  $\mathbf{p}(t)$  to the system, in  
524 which each element  $p_\alpha(t)$  is the probability to find the system at  $t$  in state  $\alpha$ . One can interpret the  
525 probability vector  $\mathbf{p}$  as the instantaneous expectation value of the state vector  $\mathbf{s}$ .

$$\mathbf{p}(t) = \mathbb{E}(\mathbf{s}(t)) \quad (22)$$

526 The probability vector obeys the discrete-time Master equation

$$\mathbf{p}(t+1) = \mathbf{T}\mathbf{p}(t)\mathbb{E}(\mathbf{s}(t+1)) = \mathbf{T}\mathbb{E}(\mathbf{s}(t)) \quad (23)$$

### 527 **Time evolution of an ensemble of identical non-interacting channels**

528 We model the experimentally observed system as a collection of non-interacting channels. A sin-  
529 gle channel can be modeled with a first-order MM. The same applies to the ensemble of non-  
530 interacting channels. We focus on modeling the time course of extensive macroscopic observables  
531 such as the mean current and fluorescence signals as well as their fluctuations. A central quantity  
532 is the vector  $\mathbf{n}(t)$  which is the occupancy of the channel states at time  $t$ :

$$\mathbf{n}(t) = \sum_{i=1}^{N_{\text{ch}}} \mathbf{s}_i(t) \quad (24)$$

533 This quantity, like  $\mathbf{s}(t)$ , is a random variate. Unlike  $\mathbf{s}(t)$ , its domain is not confined to canonical unit  
534 vectors but to  $\mathbf{n} \in \mathbb{N}^M$ . From the linearity of Eq. 24 in the channel dimension and from the single-  
535 channel CME Eq. 23 one can immediately derive the equation for the time evolution of the mean  
536 occupancy  $\bar{\mathbf{n}}(t) = \mathbb{E}[\mathbf{n}(t)]$ :

$$\bar{n}_\alpha(t+1) = \sum_{\beta} T_{\alpha,\beta} \bar{n}_\beta(t) \quad (25)$$

| Symbol                                                      | Meaning                                                                                                                                                                                                                       |
|-------------------------------------------------------------|-------------------------------------------------------------------------------------------------------------------------------------------------------------------------------------------------------------------------------|
| $\theta$                                                    | set of all unknown model parameters for which the posterior distribution is sampled                                                                                                                                           |
| $\mathbf{n}(t)$                                             | hidden ensemble occupancy vector of channel states in a specific patch at time $t$ which is a continuous Markov state vector $\mathbf{n}(t) \in \mathbb{R}^M$                                                                 |
| $\mathbf{P}(t)$                                             | variance-covariance matrix of a hidden ensemble state $\mathbf{n}(t)$ in a specific patch at time $t$ which contains the dispersion of the ensemble and the lacking knowledge of the algorithm about the true $\mathbf{n}(t)$ |
| $\mathbf{T}$                                                | transition matrix of a single channel                                                                                                                                                                                         |
| $\mathbf{K}$                                                | rate matrix which is the logarithm of the transition matrix $\mathbf{T} = \exp(\mathbf{K}\Delta t)$                                                                                                                           |
| $\mathbf{H}$                                                | observation matrix which projects the hidden ensemble state vector onto its mean signal.                                                                                                                                      |
| $\mathbf{s}$                                                | single-molecule Markov state vector                                                                                                                                                                                           |
| $k_{i,j}$                                                   | specific transition rate from state $j$ to state $i$ , $[\mathbf{K}]_{i,j} = k_{i,j}$                                                                                                                                         |
| $K_i$                                                       | ratio of two transition rates i.e. an equilibrium constant                                                                                                                                                                    |
| $\mathbf{y}(t)$                                             | data point at time $t$                                                                                                                                                                                                        |
| $\mathcal{Y}_T$                                             | time series of $T$ data points, $\mathcal{Y}_T = \{\mathbf{y}(t_i)\}_{i=1}^T$                                                                                                                                                 |
| $\mathfrak{N}_T$                                            | time series of $T$ hidden ensemble states, $\mathfrak{N}_T = \{\mathbf{n}(t_i)\}_{i=1}^T$                                                                                                                                     |
| $N_{\text{ch},j}$                                           | number of channels in patch number $j$                                                                                                                                                                                        |
| $i$                                                         | mean electrical current through a single-channel                                                                                                                                                                              |
| $\sigma_m^2$                                                | variance of the current including all noise from the patch and the recording system                                                                                                                                           |
| $\sigma_{\text{op}}^2$                                      | variance of the current noise generated by a single open-channel                                                                                                                                                              |
| $\lambda_b$                                                 | mean brightness of a bound ligand                                                                                                                                                                                             |
| $\lambda_{\text{Fl}}$                                       | mean brightness of the fluorescence signal from bulk and bound ligands                                                                                                                                                        |
| $\sigma_{\text{bulk}}^2$                                    | variance of the fluorescence generated by unbound ligands after subtraction of the image obtained for the reference dye                                                                                                       |
| $M$                                                         | number of single-channel states which is the dimension of $\mathbf{n}(t) \in \mathbb{N}^M$ in the KF algorithm                                                                                                                |
| $N_{\text{obs}}$                                            | dimensions of the observational space                                                                                                                                                                                         |
| $\mathbb{F}(\mathcal{Y})$                                   | true probability density of $\mathcal{Y}$ , i.e. the true data-generating process                                                                                                                                             |
| $\mathbb{L}(\mathcal{Y} \theta)$                            | likelihood function of the model parameters                                                                                                                                                                                   |
| $\mathbb{P}(\theta \mathcal{Y})$                            | posterior distribution of the model parameters                                                                                                                                                                                |
| $\mathbb{P}_{\text{pred}}(\tilde{\mathcal{Y}} \mathcal{Y})$ | predictive distribution of the new data points $\tilde{\mathcal{Y}}$                                                                                                                                                          |
| $\mathbb{O}(\mathbf{y} \mathbf{n})$                         | distribution of observables for a single time step                                                                                                                                                                            |
| $\mathcal{N}(\cdot)$                                        | normal distribution                                                                                                                                                                                                           |
| $\mathbb{E}[\cdot]$                                         | mean value                                                                                                                                                                                                                    |

**Table 1.** Important symbols

537 with the transition matrix  $\mathbf{T}$ . The full distribution  $\mathbb{P}(\mathbf{n}(t+1)|\mathbf{n}(t))$  is a generalized multinomial distribu-  
 538 tion. To understand the generalized multinomial distribution and how it can be constructed from  
 539 the (conventional) multinomial distribution, consider the simplified case where all channels are  
 540 assumed to be in the same state  $\alpha$ . Already after one time step, the channels will have spread out  
 541 over the state space. The channel distribution after one time step is parametrized by the transition  
 542 probabilities in row number  $\alpha$  of the single-channel transition matrix  $\mathbf{T}$ . According to the theory  
 543 of Markov models, the final distribution of channels originating from state  $\alpha$  is the multinomial  
 544 distribution

$$\mathbb{P}(\mathbf{n}^{(\alpha)}(t+1) | n_\alpha \mathbf{e}_\alpha) = \mathbb{P}(n_1, \dots, n_M | \mathbf{n}(t) = n_\alpha \mathbf{e}_\alpha) = \frac{n_\alpha!}{n_1! \dots n_M!} T_{1,\alpha}^{n_1} \dots T_{M,\alpha}^{n_M} \quad (26)$$

545 In general, the initial ensemble will not have only one but multiple occupied channel states. Be-  
 546 cause of the independence of the channels, one can imagine each initial sub-population spreading  
 547 out over the state space independently. Each sub-population with initial state  $\alpha$  gives rise to its  
 548 own final multinomial distribution that contributes  $n_\beta^{(\alpha)}$  transitions into state  $\beta$  to the total final dis-  
 549 tribution. The total number of channels at  $t+1$  in each state can then be simply found by adding  
 550 the number of channels transitioning out of the different states  $\alpha$ .

$$\mathbf{n}(t+1) = \sum_{\alpha} \mathbf{n}^{(\alpha)}(t+1) \quad (27)$$

551 Evidently, the total number of channels is conserved during propagation. The distribution of  $\mathbf{n}(t+1)$ ,  
 552 defined by Eqs. 26 and 27, is called the *generalized multinomial distribution*:

$$\mathbf{n}(t+1) \sim \text{general-multinomial}(\mathbf{n}(t), \mathbf{T}) \quad (28)$$

553 While no simple expression exists for the generalized multinomial distribution, closed form ex-  
 554 pressions for its moments can be readily derived. For large  $N_{\text{ch}}$  each  $\mathbb{P}(\mathbf{n}^{(\alpha)}(t+1) | n_\alpha \mathbf{e}_\alpha)$  can be  
 555 approximated by a multivariate-normal distribution such that also  $\text{general-multinomial}(\mathbf{n}(t), \mathbf{T})$  has a  
 556 multivariate-normal approximation. In the next section we combine the kinetics of channel ensem-  
 557 bles with the KF by a moment expansion of the governing equations for the ensemble probability  
 558 evolution.

### 559 Moment expansion of ensemble probability evolution

560 The multinomial distribution (26) has the following mean and covariance matrix

$$\bar{\mathbf{n}}^{(\alpha)}(t+1) = n_\alpha \mathbf{T}_{:, \alpha} \quad (29)$$

561

$$\boldsymbol{\Sigma}^{(\alpha)}(t+1) = n_\alpha \text{diag}(\mathbf{T}_{:, \alpha}) - n_\alpha \mathbf{T}_{:, \alpha} \mathbf{T}_{:, \alpha}^T \quad (30)$$

562 where  $\mathbf{T}_{:, \alpha}$  denotes the column number  $\alpha$  of the transition matrix and  $\text{diag}(\mathbf{T}_{:, \alpha})$  describes the diag-  
 563 onal matrix with  $\mathbf{T}_{:, \alpha}$  on its diagonal. Combining Eq. 27 with Eqs. 29 and 30 we deduce the mean  
 564 and variance of the generalized multinomial distribution:

$$\mathbb{E}[\mathbf{n}(t+1) | \mathbf{n}(t)] = \sum_{\alpha} n_\alpha(t) \mathbf{T}_{:, \alpha} = \mathbf{T} \mathbf{n}(t) \quad (31)$$

565

$$\text{cov}[\mathbf{n}(t+1), \mathbf{n}(t+1) | \mathbf{n}(t)] = \sum_{\alpha} n_\alpha(t) \left( \text{diag}(\mathbf{T}_{:, \alpha}) - \mathbf{T}_{:, \alpha} \mathbf{T}_{:, \alpha}^T \right) = \text{diag}(\mathbf{T} \mathbf{n}(t)) - \mathbf{T} \text{diag}(\mathbf{n}(t)) \mathbf{T}^T \quad (32)$$

566 Note that Eqs. 31 and 32 are conditional expectations that depend on the random state  $\mathbf{n}$  at the  
 567 previous time  $t$  and not only on the previous mean  $\bar{\mathbf{n}}$ . To find the absolute mean, the law of total  
 568 expectation is applied to Eq. 31, giving

$$\bar{\mathbf{n}}(t+1) = \mathbb{E}[\mathbb{E}[\mathbf{n}(t+1) | \mathbf{n}(t)]] = \mathbf{T} \bar{\mathbf{n}}(t), \quad (33)$$

569 in agreement with the simple derivation of Eq. 25. We introduce a shorthand  $\mathbf{P}(t) := \text{cov}(\mathbf{n}(t), \mathbf{n}(t))$   
 570 for the absolute covariance matrix of  $\mathbf{n}(t + 1)$ . Similarly,  $\mathbf{P}(t)$  can be found by applying the law of  
 571 total variance decomposition *Weiss (2005)* to Eqs. 32 and 31, giving

$$\mathbf{P}(t + 1) = \mathbb{E}[\text{cov}(\mathbf{n}(t + 1), \mathbf{n}(t + 1) | \mathbf{n}(t))] + \text{cov}[\mathbb{E}(\mathbf{n}(t + 1) | \mathbf{n}(t)), \mathbb{E}(\mathbf{n}(t + 1) | \mathbf{n}(t))] \quad (34a)$$

$$= \text{diag}(\mathbf{T}\bar{\mathbf{n}}(t)) - \mathbf{T}\text{diag}(\bar{\mathbf{n}}(t))\mathbf{T}^\top + \text{cov}(\mathbf{T}\mathbf{n}(t), \mathbf{T}\mathbf{n}(t)) \quad (34b)$$

$$= \text{diag}(\mathbf{T}\bar{\mathbf{n}}(t)) - \mathbf{T}\text{diag}(\bar{\mathbf{n}}(t))\mathbf{T}^\top + \mathbf{T}\text{cov}(\mathbf{n}(t), \mathbf{n}(t))\mathbf{T}^\top \quad (34c)$$

$$= \text{diag}(\mathbf{T}\bar{\mathbf{n}}(t)) - \mathbf{T}\text{diag}(\bar{\mathbf{n}}(t))\mathbf{T}^\top + \mathbf{T}\mathbf{P}(t)\mathbf{T}^\top \quad (34d)$$

572 where we have introduced the shorthand  $\mathbf{P}(t) = \text{cov}(\mathbf{n}(t), \mathbf{n}(t))$  in the last line. Eqs. 33, 34d are  
 573 compact analytical expressions for the mean and the covariance matrix of the occupancy vector  $\mathbf{n}$   
 574 at  $t + 1$  that depend on the mean  $\bar{\mathbf{n}}$  and covariance matrix  $\mathbf{P}$  at the previous time step  $t$ . Chaining  
 575 these equations for different time steps  $t = 0, \dots, T$  allows to model the whole evolution of a  
 576 channel ensemble. Moreover, these two equations together with the output statistics of  $\mathbb{O}(\mathbf{y}|\mathbf{n}(t))$   
 577 are sufficient to formulate correction equations of the KF *Moffatt (2007); Anderson and Moore*  
 578 *(2012)*(see Appendix 4). These equations will be used in a Bayesian context to sample the posterior  
 579 distribution of the model parameters. The sampling entails repeated numerical evaluation of the  
 580 model likelihood. Therefore, analytical equations for the ensemble evolution that can be quickly  
 581 evaluated on a computer millions of times are indispensable. This was achieved by deriving Eqs.  
 582 33, 34d. Comparing Eq. 34d with the KF prediction equation *Anderson and Moore (2012)* for  $\mathbf{P}(t)$   
 583 we obtain the state-dependent covariance matrix of Eq. 2 as

$$\mathbf{Q}(\mathbf{T}, \bar{\mathbf{n}}(t)) = \text{diag}(\mathbf{T}\bar{\mathbf{n}}(t)) - \mathbf{T}\text{diag}(\bar{\mathbf{n}}(t))\mathbf{T}^\top \quad (35)$$

584

585 In the following section on properties of measured data and the KF, we no longer need to refer  
 586 to the random variate  $\mathbf{n}(t)$ . All subsequent equations can be formulated by only using the mean  
 587 hidden state  $\bar{\mathbf{n}}(t)$  and the variance-covariance matrix of the hidden state  $\mathbf{P}(t)$ . We therefore drop  
 588 the overbar in  $\bar{\mathbf{n}}(t)$  so that the symbol  $\mathbf{n}(t)$  refers from now on to the mean hidden state.

### 589 Modeling simultaneous measurement of current and fluorescence

590 In the following, we develop a model for the conditional observation distribution  $\mathbb{O}(\mathbf{y}|\mathbf{n}(t))$ , (Ap-  
 591 pendix 3) for experimental details. Together with the hidden ensemble dynamics this will enable  
 592 us to derive the output statistics of the KF (see, below). Let  $\mathbf{y}(t)$  be the vector of all observations at  
 593  $t$ . Components of the vector are the ion current and fluorescence intensity.

$$\mathbf{y}(t) = \begin{pmatrix} \text{fluorescence intensity}(t) \\ \text{ion current}(t) \end{pmatrix} = \begin{pmatrix} y_{\text{flu}}(t) \\ y_{\text{curr}}(t) \end{pmatrix} \quad (36)$$

594 As outlined in the introduction part, in Eq. 3 we model the observation by using a conditional prob-  
 595 ability distribution  $\mathbb{O}(\mathbf{y}(t)|\mathbf{n}(t))$  that only depends on the mean hidden state  $\mathbf{n}(t)$ , as well as on fixed  
 596 channel and other measurement parameters.  $\mathbb{O}(\mathbf{y}(t)|\mathbf{n}(t))$  is modeled as a multivariate normal dis-  
 597 tribution with mean  $\mathbf{H}\mathbf{n}(t)$  and variance-covariance matrix  $\Sigma(\mathbf{n}(t))$ , that can in general depend on the  
 598 mean state vector  $\mathbf{n}(t)$  (much like the covariance matrix of the kinetics in Eq. 34d). The observation  
 599 matrix  $\mathbf{H} \in \mathbb{R}^{N_{\text{obs}} \times M}$  projects the hidden state vector  $\mathbf{n}(t) \in \mathbb{R}^{N_{\text{obs}}}$ , the observation space.  
 600 The observation distribution is

$$\mathbb{O}(\mathbf{y}(t)|\mathbf{n}(t)) = \mathcal{N}(\mathbf{y}(t)|\mathbf{H}\mathbf{n}(t), \Sigma(\mathbf{n}(t))) \Leftrightarrow \mathbf{y}(t) = \mathbf{H}\mathbf{n}(t) + \mathbf{v}(t). \quad (37)$$

601 This measurement model is very flexible and allows to include different types of signals and er-  
 602 ror sources arising from both the molecules and the instruments. A summary of the signals and  
 603 sources of measurement error and their contributions to the parameters of  $\mathbb{O}(\mathbf{y}(t)|\mathbf{n}(t))$  is provided  
 604 by Tab. 2. Below we address the two types of signals and four noise sources one by one. For

|                              | ion current                                  |                                      | fluorescence                                                         |                                         |
|------------------------------|----------------------------------------------|--------------------------------------|----------------------------------------------------------------------|-----------------------------------------|
|                              | current signal                               | measurement noise                    | fluorescence signal                                                  | background fluorescence                 |
| signaling states             | open state                                   | -                                    | ligand-bound states                                                  | -                                       |
| error term                   | open-channel noise                           | measurement noise                    | photon counts                                                        | bulk noise                              |
| affected signal              | current                                      | current                              | fluorescence                                                         | fluorescence                            |
| distribution                 | normal( $in_4, \sigma_{\text{op}}^2 n_4$ )   | normal( $0, \sigma_{\text{m}}^2$ )   | Poisson( $\lambda_b n_i(t)$ )                                        | scaled Skellam                          |
| contribution to $\mathbf{H}$ | $H_{2,4} = i$                                | -                                    | $\mathbf{H}_{1,:} = (0, \lambda_b, 2\lambda_b, 2\lambda_b)$          | -                                       |
| contribution to $\Sigma$     | $\Sigma_{2,2} = \sigma_{\text{op}}^2 n_4(t)$ | $\Sigma_{2,2} = \sigma_{\text{m}}^2$ | $\Sigma_{1,1} = (0, \lambda_b, 2\lambda_b, 2\lambda_b)\mathbf{n}(t)$ | $\Sigma_{1,1} = \sigma_{\text{back}}^2$ |

**Table 2.** Summary of signals and noise sources for the exemplary CCCO model with the closed states  $\alpha = 1, 2, 3$  and the open state  $\alpha = 4$ . The observed space is two-dimensional with  $y_{Fl} =$  fluorescence and  $y_I =$  ion current. The fluorescence signal is assumed to be derived from the difference of two spectrally different Poisson distributed fluorescent signals. That procedure results in scaled Skellam distribution of the noise.

605 this we decompose the observation matrix and the observation noise covariance matrix into the  
606 individual terms:

$$\mathbf{H} = \mathbf{H}_I + \mathbf{H}_{\text{binding}} \quad (38)$$

$$\Sigma(t) = \Sigma_{\text{open}}(t) + \Sigma_{\text{meas.}} + \Sigma_{\text{binding}}(t) + \Sigma_{\text{back}} \quad (39)$$

607 In the following, we report the individual matrices for the exemplary CCCO model with one open  
608 state  $\alpha = 4$  and three closed states  $\alpha = 1, 2, 3$ . Matrices can be constructed analogously for the  
609 other models. For the definition of  $\Sigma_{\text{back}}$  refer to (Appendix 3).

### 610 Macroscopic current and open-channel noise

611 We model the current and the intrinsic fluctuations of the open-channel state  $\mathbf{s} = \mathbf{e}_4$  (the *open*  
612 *channel noise*) by a state-dependent normal distribution with mean  $in_4(t)$  where  $n_4(t)$  is the number  
613 of channels in the open state at  $t$  and  $i$  is the single-channel current. The additional variance of  
614 the single-channel current is described by  $\sigma_{\text{open}}^2$ . The sum of the instrumental noise of the experi-  
615 mental setup and the *open channel noise* is modeled as uncorrelated (white) normally distributed  
616 noise with the mean  $\mathbb{E}[v_I(t)] = 0$  and variance  $\mathbb{E}[v_I^2(t)] = \sigma_{\text{op}}^2 n_4(t) + \sigma_{\text{m}}^2$ . By making the open-channel  
617 noise dependent on the hidden state population  $n_4(t)$ , we fully take advantage of the flexibility of  
618 Bayesian networks which admits an (explicitly or implicitly) time-dependent observation model. By  
619 tabulating the parameters of the two normal distributions into  $\mathbf{H}$  and  $\Sigma$ , we obtain

$$\mathbf{H}_I := \begin{pmatrix} 0 & 0 & 0 & 0 \\ 0 & 0 & 0 & i \end{pmatrix} \quad (40)$$

620

$$\Sigma_{\text{open}}(t) + \Sigma_{\text{meas.}} := \begin{pmatrix} 0 & 0 \\ 0 & \sigma_{\text{op}}^2 n_4(t) + \sigma_{\text{m}}^2 \end{pmatrix} \quad (41)$$

621 One can now ask for the variance of a data point  $y(t)$  given the epistemic and aleatory uncertainty  
622 of  $\mathbf{n}(t)$  encoded by  $\mathbf{P}(t)$  in Eq. 34d. By using the law of total variance the signal variance follows as:

$$\text{var}(\mathbf{y}(t)) = \mathbb{E}[\text{var}[\mathbf{y}(t)|\mathbf{n}(t)]] + \text{var}[\mathbb{E}[\mathbf{y}(t)|\mathbf{n}(t)]] \quad (42a)$$

$$= \mathbb{E}[\sigma_{\text{op}}^2 n_4(t) + \sigma_{\text{m}}^2] + \text{var}[\mathbf{H}_I \mathbf{n}(t)] \quad (42b)$$

$$= \sigma_{\text{op}}^2 \mathbb{E}[n_4(t)] + \sigma_{\text{m}}^2 + (\mathbf{H}_I \mathbf{P}(t) \mathbf{H}_I^T)_{2,2} \quad (42c)$$

623 See, Appendix Sec. 4.1 for further details.

## 624 Fluorescence and photon-counting noise

625 The statistics of photon counts in the fluorescence signal are described by a Poisson distribution  
626 with emission rate  $\lambda_{\text{Fl}}$

$$y_{\text{Fl}}(t) \sim \text{pois}(\lambda_{\text{Fl}}(t)). \quad (43)$$

627 The total emission rate  $\lambda_{\text{Fl}}$  can be modeled as a weighted sum of the specific emission rates  $\lambda_b$   
628 of each ligand class  $\{0, 1, 2\}$ . The weights are given by the stoichiometric factors which reflect the  
629 number of bound ligands. In order to cast the Poisson distribution into the functional form of the  
630 observation model (Eq. 37), we invoke the central limit theorem to approximate

$$y_{\text{Fl}} \sim \text{pois}(\lambda_{\text{Fl}}) \approx \mathcal{N}(\lambda_{\text{Fl}}(t), \lambda_{\text{Fl}}(t)) \quad (44)$$

631 The larger  $\lambda_{\text{Fl}}$  the better is the approximation. We assume, that the confocal volume is equally  
632 illuminated. For our model of ligand fluorescence, we assume for a moment that there is no signal  
633 coming from ligands in the bulk. We will drop this assumption in the next section. With these  
634 assumptions, we arrive at the following observation matrix

$$\mathbf{H}_{\text{binding}} := \begin{pmatrix} 0 & \lambda_b & 2\lambda_b & 2\lambda_b \\ 0 & 0 & 0 & 0 \end{pmatrix} \quad (45)$$

635 The matrix  $\mathbf{H}$  aggregates the states into two conductivity classes: non-conducting and conducting  
636 and three different fluorescence classes. The first element  $(\mathbf{H}\mathbf{n})_1$  is the mean fluorescence  $\lambda_{\text{Fl}}(t) =$   
637  $\lambda_b[n_2(t) + 2(n_3(t) + n_4(t))]$ . The variance-covariance matrix  $\Sigma_{\text{binding}}$  can be derived along the same lines  
638 using Eq. 44. We find

$$\Sigma_{\text{binding}}(t) := \begin{pmatrix} (\mathbf{H}\mathbf{n}(t))_1 & 0 \\ 0 & 0 \end{pmatrix} \quad (46)$$

639 Under these assumptions the observation matrix can be written as follows

$$\mathbf{H} := \begin{pmatrix} 0 & \lambda_b & 2\lambda_b & 2\lambda_b \\ 0 & 0 & 0 & i \end{pmatrix} \quad (47)$$

## 640 Output statistics of a Kalman Filter with two-dimensional state-dependent noise

641 Now simultaneously measured current and fluorescence data  $\mathbf{y} \in \mathbb{R}^2$ , obtained by cPCF, are mod-  
642 eled. Thus, the observation matrix fulfills  $\mathbf{H} \in \mathbb{R}^{2 \times M}$ . One can formulate the observation distribu-  
643 tion as

$$\mathbf{y}(t) = \mathbf{H}\mathbf{n}(t) + \mathbf{v}_m(t) + \begin{pmatrix} v_{\text{pois}}(t) \\ v_{\text{op}}(t) \end{pmatrix} \Leftrightarrow \mathbf{y} \sim \mathcal{N}(\mathbf{H}\mathbf{n}(t), \Sigma(t)). \quad (48)$$

644 The vector  $\mathbf{v}_m$  denotes the experimental noise, with  $\mathbb{E}[\mathbf{v}_m] = 0$  and variance given by the diago-  
645 nal matrix  $\Sigma_{\text{meas}} + \Sigma_{\text{back}}$ . The second noise term arises from Poisson-distributed photon counting  
646 statistics and the open-channel noise. It has the properties

$$\mathbb{E} \left[ \begin{pmatrix} v_{\text{pois}}(t) \\ v_{\text{op}}(t) \end{pmatrix} \right] = 0 \quad (49)$$

647 and

$$\text{cov} \left( \begin{pmatrix} v_{\text{pois}}(t) \\ v_{\text{op}}(t) \end{pmatrix}, \begin{pmatrix} v_{\text{pois}}(t) \\ v_{\text{op}}(t) \end{pmatrix} \right) = \Sigma_{\text{open}}(t) + \Sigma_{\text{binding}}(t) \quad (50)$$

648 . The matrix  $\Sigma$  is a diagonal matrix. To derive the covariance matrix  $\text{cov}(\mathbf{y}(t))$  we need to additionally  
649 calculate  $\text{var}(y_{\text{fluo}}(t))$  and  $\text{cov}(y_{\text{fluo}}(t), y_{\text{patch}}(t))$ . By the same arguments as above we get

$$\text{var}[y_{\text{fluo}}(t)] = \mathbb{E}[\text{var}(y(t)|\mathbf{n}(t))] + \text{var}[\mathbb{E}(y(t)|\mathbf{n}(t))] \quad (51a)$$

$$= \mathbb{E}[\sigma_{\text{back}}^2 + (\mathbf{H}\mathbf{n}(t))_1] + \text{var}(\mathbf{H}\mathbf{n}(t)) \quad (51b)$$

$$= \sigma_{\text{back}}^2 + (\mathbf{H}\mathbf{n}(t))_1 + (\mathbf{H}\mathbf{P}(t))\mathbf{H}^T_{1,1} \quad (51c)$$

650 The cross terms can be calculated by using the law of total covariance

$$\text{cov}(y_{\text{patch}}, y_{\text{fluo}}) = \mathbb{E}[\text{cov}(y_{\text{patch}}, y_{\text{fluo}} | \mathbf{n})] + \text{cov}(\mathbb{E}(y_{\text{patch}} | \mathbf{n}), \mathbb{E}(y_{\text{fluo}} | \mathbf{n})) \quad (52a)$$

$$= 0 + \text{cov}(\mathbf{H}_{2,:} \mathbf{n}, \mathbf{H}_{1,:} \mathbf{n}) \quad (52b)$$

$$= \mathbf{H}_{2,:} \text{cov}(\mathbf{n}, \mathbf{n}) \mathbf{H}_{1,:}^T = \mathbf{H}_{2,:} \mathbf{P}(t) \mathbf{H}_{1,:}^T \quad (52c)$$

651 yielding the matrix

$$\text{cov}(\mathbf{y}, \mathbf{y}) = \mathbf{H} \mathbf{P}(t) \mathbf{H}^T + \mathbf{\Sigma}(t) \quad (53)$$

652 We assumed that the Poisson distribution is well captured by the normal approximation. In cPCF  
 653 data the ligand binding to only a sub-ensemble of the channels is monitored, which we assume  
 654 to represent the conducting ensemble such that  $N_{\text{ch,FL}} = N_{\text{ch,I}}$ . For real data further refinement  
 655 might be necessary to model the randomness of the sub-ensemble in the summed voxels. With  
 656 the time evolution equations for the mean (Eq. 31) and for the covariance matrix (Eq. 34d) as well  
 657 as with the expressions for the signal variance we possess all parameters that are needed in the  
 correction equation of the *KFKalman (1960); Anderson and Moore (2012)*.

| Algorithm. | Prediction |            | Correction |            |
|------------|------------|------------|------------|------------|
|            | Mean       | Covariance | Mean       | Covariance |
| RE         | Yes        | No         | No         | No         |
| KF         | Yes        | Yes        | Yes        | Yes        |

**Table 3.** Comparison of algorithms: The RE approach predicts the next mean ensemble state, estimates probabilities of occupying a certain state by  $\mathbf{p} \approx \frac{1}{N_{\text{ch}}} \mathbb{E}[\mathbf{n}(t+1)]$  and constructs a likelihood by a multinomial assumption *Milescu et al. (2005)*. The multinomial distribution is then approximated by a normal distribution and the variance from the experimental noise is added. There is neither a prediction of  $\mathbf{P}(t)$  nor any correction step, thus the random fluctuations and the hidden structure of an ion channel ensemble of finite size is ignored. In contrast, the KF accounts correctly for all aspects of the hidden stochastic dynamics of the ion channels as long as all involved distributions can be approximated by multivariate normal distributions. This is a much less restrictive assumption than assuming that the ensemble is fully determined just by its mean value. Additionally, the KF includes the information from the data in each state estimation in an optimal manner.

658

### 659 The correction step

660 For completeness we write down the correction step of the KF though its derivation can be found  
 661 in *Chen et al. (2003); Anderson and Moore (2012); Moffatt (2007)*. The mean ensemble state  $\mathbf{n}(t)$  is  
 662 corrected by the current data point

$$\mathbf{n}(t)_{\text{posterior}} = \mathbf{n}(t)_{\text{prior}} + \mathbf{K} (\mathbf{y}(t) - \mathbf{H} \mathbf{n}(t)_{\text{prior}}) \quad (54)$$

663 Where Kalman gain matrix  $\mathbf{K} := \mathbf{P}(t)_{\text{prior}} \mathbf{H}^T \mathbf{\Sigma}^{-1}$  evaluates the intrinsic noise against the experimental  
 664 noise. How precise are my model predictions about  $\mathbf{n}(t)$  compared with the information gained  
 665 about  $\mathbf{n}(t)$  by measuring  $\mathbf{y}(t)$ . The covariance  $\mathbf{P}(t)$  of the ensemble state  $\mathbf{n}(t)$  is corrected by

$$\mathbf{P}(t)_{\text{posterior}} = \mathbf{P}(t)_{\text{prior}} - \mathbf{K} (\mathbf{H} \mathbf{P}(t)_{\text{prior}} \mathbf{H} + \mathbf{\Sigma}(t)) \mathbf{K}^T \quad (55)$$

666 Appendix Eq. 28 and 29 form with Methods Eq. 26 and 30 the filtering equations which summarize  
 667 the algorithm. One initialises the first  $\mathbf{n}(0)$  and  $\mathbf{P}(0)$  and with an equilibrium assumption.



668 **Bayesian Model selection via predictive accuracy**

669 The minimum of the Kullback-Leibler divergence can be found asymptotically by maximizing the  
 670 predictive accuracy *Burnham and Anderson (2004); Gelman et al. (2014)* The predictive accuracy is  
 671 defined as

$$\log \mathbb{P}_{\text{pred}}(\tilde{\mathcal{Y}}_T) := \log \mathbb{E}_{\theta, \text{post}}[\mathbb{L}(\tilde{\mathcal{Y}}_T | \theta)] = \log \int \mathbb{L}(\tilde{\mathcal{Y}}_T | \theta) \mathbb{P}_{\text{post}}(\theta | \mathcal{Y}_T) d\theta \quad (56)$$

672 for a specific new (held-out) data set  $\tilde{\mathcal{Y}}_T$ , which has not been used for training the model *Gelman*  
 673 *et al. (2014)*.  $\mathbb{E}_{\text{post}}[\cdot]$  denotes the average of some function found by integrating it over the poste-  
 674 rior distribution  $\mathbb{P}_{\text{post}}(\theta | \mathcal{Y}_T)$ . The difference between maximum likelihood (or maximum *a posteriori*  
 675 cross-validation, MPC) to Bayesian cross-validation in Eq. 56 is that the mentioned point estimates  
 676 in MPC would yield a Dirac distribution  $\mathbb{P}_{\text{post}}(\theta | \mathcal{Y}_T) = \delta(\theta_{\text{MLE}} - \theta)$  as the posterior. Doing so col-  
 677 lapses the integral in Eq. 56 to  $\log \mathbb{L}(\tilde{\mathcal{Y}}_T | \theta_{\text{MLE}})$ . Note, that Eq. 56 can also be used to selected the  
 678 prior distribution for the parameters if the average is taken with respect to the prior distribution  
 679 instead of to the posterior distribution. In our application to ion channel dynamics, we generate  
 680 from each patch that was used for the training data at least a second hold-out time trace to validate  
 681 the model. Here we explicitly use the term *model* in a way that includes the observation model and  
 682 is not restricted to the kinetic scheme. A model of all unknowns considered to be relevant for the  
 683 data. Moreover, assuming the availability of multiple time traces from the same patch allows to  
 684 avoid difficulties of applying cross-validation within one time series. Since we wish to know the pre-  
 685 dictive performance of the model for all possible unseen data sets, we have also to average over  
 686 the unknown true data generating process  $\mathbb{F}(\tilde{y}(t))$ . The objective of the experiment is then to sam-  
 687 ple sequences of data  $\mathcal{Y}_T$  which are as representative as possible for  $\mathbb{F}$ . The expected predictive  
 688 accuracy for a full unseen set of time series of data is then

$$\mathbb{E}_{\mathbb{F}}[\log \mathbb{P}_{\text{pred}}(\tilde{\mathcal{Y}}_T | \mathcal{Y}_T)] = \int \dots \int \log \mathbb{P}_{\text{pred}}(\tilde{\mathcal{Y}}_T | \mathcal{Y}_T) \mathbb{F}(\tilde{\mathcal{Y}}_T) \prod_i d\tilde{y}_i \quad (57)$$

689 Unfortunately,  $\mathbb{F}(\tilde{\mathcal{Y}}_T)$  is unknown. In practice the expectation value in Eq. 57 is approximated sum-  
 690 ming over independent realizations generated by the experiment.

$$\mathbb{E}_{\mathbb{F}}[\log \mathbb{P}_{\text{pred}}(\tilde{\mathcal{Y}}_T | \mathcal{Y}_T)] \approx \sum_{k=1}^K [\log \mathbb{P}_{\text{pred}}(\tilde{\mathcal{Y}}_T^{(k)} | \mathcal{Y}_T)] \quad (58)$$

691 If no independent realizations are available e.g. if experiments are expensive, the estimation can be  
 692 performed over the training data instead, i.e. setting  $\tilde{\mathcal{Y}}_T = \mathcal{Y}_T$ . But this leads to an over-optimistic  
 693 biased predictive accuracy estimate *Gelman et al. (2014)*. To compensate for that optimistic bias  
 694 one needs to penalize the model complexity *Gelman et al. (2014)* which is done by scores called in-  
 695 formation criteria. The first non-Bayesian information criterion was found by Akaike *Akaike (1998)*.  
 696 It states that for linear models with Gaussian noise, with no hidden structures, asymptotically one  
 697 can compensate the too optimistic bias from the training sample by subtracting the number of  
 698 parameters  $\text{dim}(\theta)$  of the model

$$\text{AIC} = \log \mathbb{P}(\mathcal{Y}_T | \hat{\theta}_{\text{MLE}}) - \text{dim}(\theta). \quad (59)$$

699 Under those conditions AIC is asymptotically equivalent to cross-validation *Stone (1977)*. These very  
 700 restrictive model conditions are not satisfied by models with hidden or latent structures *Watanabe*  
 701 *(2007)*. Thus AIC has no mathematical justification for any Biophysical data model, whose experi-  
 702 mental base is a signal which probes some hidden dynamics. We show (Fig. 7 b), that AIC fails to  
 703 predict the true data-generating process unless the data are strong enough to create a multivariate  
 704 normal posterior. Recently, Watanabe *Watanabe (2010)* showed for muc broader class of models,  
 705 including singular models, that asymptotically WAIC is equivalent for large data sets to Bayesian  
 706 cross-validation Thus the predictive accuracy of the model Eq. 57 can be estimated by

$$\text{WAIC} := \log \mathbb{P}_{\text{post}}(\mathcal{Y}_T) - p_{\text{WAIC}} \quad (60)$$

| Algori.            | Strategy |      |     |     |       |                   |
|--------------------|----------|------|-----|-----|-------|-------------------|
|                    | AIC      | WAIC | MPC | BC  | CMEXP | $\mathbb{E}[r^2]$ |
| RE <sub>PC</sub>   | No       | No   | Yes | Yes | No    | No                |
| KF <sub>PC</sub>   | No       | Yes  | Yes | Yes | Yes   | Yes               |
| KF <sub>cPCF</sub> | No(Yes)  | Yes  | Yes | Yes | Yes   | Yes               |

**Table 4.** Model selection strategies by estimating the predictive accuracy (columns 1-4), by continuous model expansion (CMEXP) (column 5) and by residual  $r^2$  (column 6). The No(Yes) means that for the used example we were successful but for AIC there is no asymptotic guarantee that it converges with large  $N_{\text{data}}$  to the true value.

707 The bias correction  $p_{\text{WAIC}} = \text{var}_{\text{post}}(\log \mathbb{P}(\mathcal{J}|\theta))$  is asymptotically correct even for singular models  
 708 and reduces to the form from Akaike expected  $\dim(\theta)$  for regular normal models *Gelman et al. (2014)*.  
 709 We show that in order to reliably detect overfitting and determine the best generalizing model  
 710 on the training data, it is inevitable to use the KF instead of REs, see Fig. 7 a, b. Notably, WAIC  
 711 exploits the full posterior thus model selection for singular model should usually be done within the  
 712 Bayesian framework. The obvious way to estimate Eq. 57 by Eq. 56 used through out this study as a  
 713 reference is with hold out data. In order to decide upon a parsimonious model, predictive accuracy  
 714 methods should be combined with the continuous model expansion technique to interpret the  
 715 cross-validation and information criteria correctly.

## 716 Acknowledgments

717 The authors are grateful to Dr. E. Schulz and Dr. T. Eick for designing a software to simulate channel  
 718 activity in ensemble patches and computing time traces, respectively. F.P. acknowledges funding  
 719 from the Yen Post-Doctoral Fellowship in Interdisciplinary Research and from the National Cancer  
 720 Institute of the National Institutes of Health (NIH) through Grant CA093577. The authors are also in-  
 721 debted to M. Habeck and I. Schroeder for comments on the manuscript, to M. Bücken for help with  
 722 the computer cluster at the Friedrich Schiller University Jena, and to F. Noé, R. Blunck, G. Mirams  
 723 and S. Presse for helpful discussions. This work was supported by the Research Unit 2518 Dynlon  
 724 (Project P2) and the TRR 166 ReceptorLight (Project A5) of the Deutsche Forschungsgemeinschaft  
 725 to K.B.

## 726 References

- 727 **Akaike H.** A New Look at the Statistical Model Identification. New York, NY: Springer New York; 1998.
- 728 **Alcantara P,** Cardenas LM, Swillens S, Scroggs RS. Reduced Transition between Open and Inactivated Channel  
 729 States Underlies 5HT Increased INa+ in Rat Nociceptors. *Biophys J.* 2002; 83(1):5–21. doi: 10.1016/S0006-  
 730 3495(02)75146-1.
- 731 **Anderson BD,** Moore JB. Optimal filtering. Courier Corporation; 2012.
- 732 **Auger-Methe Marie,** Field Chris, Albertsen Christoffer M , Derocher Andrew E , Lewis Mark A , Jonsen Ian D ,  
 733 Mills Flemming Joanna. State-space models' dirty little secrets: even simple linear Gaussian models can have  
 734 estimation problems. *Scientific Reports.* 2016 may; 6:26677. doi: 10.1038/srep26677; 10.1038/srep26677.
- 735 **Ball F.** MCMC for Ion-Channel Sojourn-Time Data: A Good Proposal. *Biophys J.* 2016; 111(2):267–268. doi:  
 736 [10.1016/j.bpj.2016.02.042](https://doi.org/10.1016/j.bpj.2016.02.042).
- 737 **Ball F G CYKJB,** A O. Bayesian inference for ion-channel gating mechanisms directly from single-channel  
 738 recordings, using Markov chain Monte Carlo. *Proc R Soc Lond A.* 1999; .
- 739 **Betancourt M.** A conceptual introduction to Hamiltonian Monte Carlo. arXiv preprint arXiv:170102434. 2017;  
 740 .

- 741 **Biskup C**, Kusch J, Schulz E, Nache V, Schwede F, Lehmann F, Hagen V, Benndorf K. Relating ligand binding  
742 to activation gating in CNGA2 channels. *Nature*. 2007 feb; 446:440. doi: 10.1038/nature05596; 10.1038/na-  
743 ture05596.
- 744 **Bronson JE**, Fei J, Hofman JM, Gonzalez Jr RL, Wiggins CH. Learning rates and states from biophysical time series:  
745 a Bayesian approach to model selection and single-molecule FRET data. *Biophys J*. 2009; 97(12):3196–3205.
- 746 **Brown C**, Dalal R, Hebert B, Digman M, Horwitz A, Gratton E. Raster image correlation spectroscopy (RICS) for  
747 measuring fast protein dynamics and concentrations with a commercial laser scanning confocal microscope.  
748 *Journal of microscopy*. 2008; 229(1):78–91.
- 749 **Bruening-Wright A**, Elinder F, Larsson HP. Kinetic Relationship between the Voltage Sensor and the Activation  
750 Gate in spHCN Channels. *J of Gen Physiol*. 2007; 130(1):71–81. doi: 10.1085/jgp.200709769.
- 751 **Burnham KP**, Anderson DR. Multimodel inference: understanding AIC and BIC in model selection. *Sociological*  
752 *methods & research*. 2004; 33(2):261–304.
- 753 **Calderhead B**, Epstein M, Sivilotti L, Girolami M. 13. In: *Bayesian Approaches for Mechanistic Ion Channel*  
754 *Modeling* Totowa, NJ: Humana Press; 2013. p. 247–272.
- 755 **Celentano JJ**, Hawkes AG. Use of the Covariance Matrix in Directly Fitting Kinetic Parameters: Application to  
756 GABAA Receptors. *Biophys J*. 2004; 87(1):276–294. doi: 10.1529/biophysj.103.036632.
- 757 **Chen Z**, et al. Bayesian filtering: From Kalman filters to particle filters, and beyond. *Statistics*. 2003; 182(1):1–69.
- 758 **Chung SH**, Moore JB, Xia L, Premkumar L, Gage PW. Characterization of single channel currents using digital  
759 signal processing techniques based on hidden Markov models. *Philos T of the Roy Soc of Lond Series B Bio*  
760 *Sci*. 1990; 329(1254):265–285.
- 761 **Clancy CE**, Rudy Y. Cellular consequences of HERG mutations in the long QT syndrome: precursors to sudden  
762 cardiac death. *Cardiovascular research*. 2001; 50(2):301–313.
- 763 **Colquhoun D**, Hawkes GA. The Principles of the Stochastic Interpretation of Ion-Channel Mechanisms. In:  
764 Sakmann B., Neher E. (eds) *Single-Channel Recording*. Springer, Boston, MA; (1995).
- 765 **Colquhoun D**, Hawkes GA, Bernard K. On the stochastic properties of single ion channels. *P of the Roy Soc of*  
766 *London Series B Biological Sciences*. 1981; 211(1183):205–235. doi: 10.1098/rspb.1981.0003.
- 767 **Colquhoun D**, Hawkes GA, Bernard K. Relaxation and fluctuations of membrane currents that flow through  
768 drug-operated channels. *Proc R Soc Lond B*. 1997; .
- 769 **Deuflhard P**, Weber M. Robust Perron cluster analysis in conformation dynamics. *Linear Algebra Appl*. 2005;  
770 398(Supplement C):161–184. doi: 10.1016/j.laa.2004.10.026, special Issue on Matrices and Mathematical  
771 *Biology*.
- 772 **Epstein M**, Calderhead B, Girolami MA, Sivilotti LG. Bayesian Statistical Inference in Ion-Channel Models with  
773 Exact Missed Event Correction. *Biophys J*. 2016; 111(2):333–348. doi: 10.1016/j.bpj.2016.04.053.
- 774 **Fearnhead P**, Giagos V, Sherlock C. Inference for reaction networks using the linear noise approximation.  
775 *Biometrics*. 2014; 70(2):457–466.
- 776 **Finkenstädt B**, Woodcock DJ, Komorowski M, Harper CV, Davis JR, White MR, Rand DA, et al. Quantifying  
777 intrinsic and extrinsic noise in gene transcription using the linear noise approximation: an application to  
778 single cell data. *Ann Appl Stat*. 2013; 7(4):1960–1982.
- 779 **Folia MM**, Rattray M. Trajectory inference and parameter estimation in stochastic models with temporally  
780 aggregated data. *Statistics and Computing*. 2018 Sep; 28(5):1053–1072. doi: 10.1007/s11222-017-9779-x.
- 781 **Frauenfelder H**, Sligar S, Wolynes P. The energy landscapes and motions of proteins. *Science*. 1991;  
782 254(5038):1598–1603. doi: 10.1126/science.1749933.
- 783 **Fredkin DR**, Rice JA. Maximum likelihood estimation and identification directly from single-channel recordings.  
784 *P of the Roy Soc of London Series B: Biological Sciences*. 1992; 249(1325):125–132.
- 785 **Gelman A**, Hwang J, Vehtari A. Understanding predictive information criteria for Bayesian models. *Statistics*  
786 *and Computing*. 2014 Nov; 24(6):997–1016. doi: 10.1007/s11222-013-9416-2.

- 787 **Gelman A**, Lee D, Guo J. Stan: A probabilistic programming language for Bayesian inference and optimization.  
788 *J of Educational and Behavioral Statistics*. 2015; 40(5):530–543.
- 789 **Gelman A**, Simpson D, Betancourt M. The prior can often only be understood in the context of the likelihood.  
790 *Entropy*. 2017; 19(10):555.
- 791 **Ghahramani Z**. Learning dynamic Bayesian networks. In: *International School on Neural Networks, Initiated by*  
792 *IIASS and EMFCSC* Springer; 1997. p. 168–197.
- 793 **Gillespie CS**, Golightly A. Bayesian inference for the chemical master equation using approximate models. In:  
794 *Ninth International Workshop on Computational Systems Biology, WCSB 2012, June 4-6, Ulm, Germany*, vol. 4;  
795 2012. p. 23.
- 796 **Gillespie Daniel T** . Exact stochastic simulation of coupled chemical reactions. *The J of Phys Chem*. 1977;  
797 81(25):2340–2361.
- 798 **Gin E**, Falcke M, Wagner LE, Yule DI, Sneyd J. Markov chain Monte Carlo fitting of single-channel data from  
799 inositol trisphosphate receptors. *J of Theoretical Biology*. 2009; 257(3):460–474.
- 800 **Goldschen-Ohm MP**, Wagner DA, Petrou S, Jones MV. An epilepsy-related region in the GABAA receptor medi-  
801 ates long-distance effects on GABA and benzodiazepine binding sites. *Mol Pharmacol*. 2010; 77(1):35–45.
- 802 **de Gunst MM**, Künsch H, Schouten J. Statistical analysis of ion channel data using hidden Markov models  
803 with correlated state-dependent noise and filtering. *Journal of the American Statistical Association*. 2001;  
804 96(455):805–815.
- 805 **Hines KE**. A Primer on Bayesian Inference for Biophysical Systems. *Biophys J*. 2015; 108(9):2103–2113.
- 806 **Hines KE**, Bankston JR, Aldrich RW. Analyzing Single-Molecule Time Series via Nonparametric Bayesian Infer-  
807 ence. *Biophys J*. 2015; 108(3):540–556. doi: [10.1016/j.bpj.2014.12.016](https://doi.org/10.1016/j.bpj.2014.12.016).
- 808 **Hines KE**, Middendorf TR, Aldrich RW. Determination of parameter identifiability in nonlinear biophysical mod-  
809 els: A Bayesian approach. *The J of General Physiology*. 2014; 143(3):401–416. doi: [10.1085/jgp.201311116](https://doi.org/10.1085/jgp.201311116).
- 810 **Hoffman MD**, Gelman A. The No-U-Turn sampler: adaptively setting path lengths in Hamiltonian Monte Carlo.  
811 *J of Machine Learning Research*. 2014; 15(1):1593–1623.
- 812 **van Holde K**. A hypothesis concerning diffusion-limited protein–ligand interactions. *Biophys Chem*. 2002;  
813 101:249–254.
- 814 **Horn R**, Lange K. Estimating kinetic constants from single channel data. *Biophys J*. 1983; 43(2):207–223. doi:  
815 [10.1016/S0006-3495\(83\)84341-0](https://doi.org/10.1016/S0006-3495(83)84341-0).
- 816 **Hwang Y**, Kim JS, Kweon IS. Sensor noise modeling using the Skellam distribution: Application to the color edge  
817 detection. In: *2007 IEEE conference on computer vision and pattern recognition IEEE*; 2007. p. 1–8.
- 818 **Jahnke T**, Huisinga W. Solving the chemical master equation for monomolecular reaction systems analytically.  
819 *J Math Biol*. 2007 Jan; 54(1):1–26. doi: [10.1007/s00285-006-0034-x](https://doi.org/10.1007/s00285-006-0034-x).
- 820 **Jahnke T**, Huisinga W. Solving the chemical master equation for monomolecular reaction systems analytically.  
821 *J of mathematical biology*. 2007; 54(1):1–26.
- 822 **Jaynes ET**. Information theory and statistical mechanics. *Phys rev*. 1957; 106(4):620.
- 823 **Kalman RE**. A new approach to linear filtering and prediction problems. *J of basic Engineering*. 1960; 82(1):35–  
824 45.
- 825 **Kalstrup T**, Blunck R. Dynamics of internal pore opening in KV channels probed by a fluorescent unnatural  
826 amino acid. *Proc of the Nat Academy of Sci*. 2013; 110(20):8272–8277.
- 827 **Kalstrup T**, Blunck R. S4–S5 linker movement during activation and inactivation in voltage-gated K+ channels.  
828 *Proc of the Nat Academy of Sci*. 2018; 115(29):E6751–E6759.
- 829 **Kienker P**. Equivalence of aggregated Markov models of ion-channel gating. *P of the Roy Soc of London B*  
830 *Biological Sciences*. 1989; 236(1284):269–309.
- 831 **Komorowski M**, Finkenstädt B, Harper CV, Rand DA. Bayesian inference of biochemical kinetic parameters  
832 using the linear noise approximation. *BMC Bioinformatics*. 2009; 10:343–343.

- 833 **Kullback S**, Leibler RA. On information and sufficiency. *The annals of mathematical statistics*. 1951; 22(1):79–  
834 86.
- 835 **Kurtz TG**. The relationship between stochastic and deterministic models for chemical reactions. *The J of Chem*  
836 *Phys*. 1972; 57(7):2976–2978.
- 837 **Kusch J**, Biskup C, Thon S, Schulz E, Nache V, Zimmer T, Schwede F, Benndorf K. Interdependence of Re-  
838 ceptor Activation and Ligand Binding in HCN2 Pacemaker Channels. *Neuron*. 2010; 67(1):75–85. doi:  
839 [10.1016/j.neuron.2010.05.022](https://doi.org/10.1016/j.neuron.2010.05.022).
- 840 **Kusch J**, Thon S, Schulz E, Biskup C, Nache V, Zimmer T, Seifert R, Schwede F, Benndorf K. How subunits  
841 cooperate in cAMP-induced activation of homotetrameric HCN2 channels. *Nature Chemical Biology*. 2011  
842 dec; 8:162. doi: [10.1038/nchembio.747](https://doi.org/10.1038/nchembio.747); [10.1038/nchembio.747](https://doi.org/10.1038/nchembio.747).
- 843 **McElreath R**. *Statistical rethinking: A Bayesian course with examples in R and Stan*. Chapman and Hall/CRC;  
844 2018.
- 845 **Middendorf TR**, Aldrich RW. The structure of binding curves and practical identifiability of equilibrium ligand-  
846 binding parameters. *J of General Physiology*. 2017; 149(1):121–147.
- 847 **Milescu LS**, Akk G, Sachs F. Maximum Likelihood Estimation of Ion Channel Kinetics from Macroscopic Currents.  
848 *Biophys J*. 2005; 88(4):2494–2515. doi: [10.1529/biophysj.104.053256](https://doi.org/10.1529/biophysj.104.053256).
- 849 **Moffatt L**. Estimation of Ion Channel Kinetics from Fluctuations of Macroscopic Currents. *Biophys J*. 2007;  
850 93(1):74–91. doi: [10.1529/biophysj.106.101212](https://doi.org/10.1529/biophysj.106.101212).
- 851 **Munsky B**, Trinh B, Khammash M. Listening to the noise: random fluctuations reveal gene network parameters.  
852 *Mol Syst Biol*. 2009; 5(1):318. doi: [10.1038/msb.2009.75](https://doi.org/10.1038/msb.2009.75).
- 853 **Neher E**, Sakmann B. Single-channel currents recorded from membrane of denervated frog muscle fibres.  
854 *Nature*. 1976; 260(5554):799–802. doi: [10.1038/260799a0](https://doi.org/10.1038/260799a0).
- 855 **Noé F**, Doose S, Daidone I, Löllmann M, Sauer M, Chodera JD, Smith JC. Dynamical fingerprints for probing  
856 individual relaxation processes in biomolecular dynamics with simulations and kinetic experiments. *P Natl*  
857 *Acad Sci USA*. 2011; 108(12):4822–4827. doi: [10.1073/pnas.1004646108](https://doi.org/10.1073/pnas.1004646108).
- 858 **Noé F**, Wu H, Prinz JH, Plattner N. Projected and hidden Markov models for calculating kinetics and metastable  
859 states of complex molecules. *The J of Chem Phys*. 2013; 139(18):184114. doi: [10.1063/1.4828816](https://doi.org/10.1063/1.4828816).
- 860 **Noé F**, Wu H, Prinz JH, Plattner N. Projected and hidden Markov models for calculating kinetics and metastable  
861 states of complex molecules. *J Chem Phys*. 2013; 139(18):184114. doi: [10.1063/1.4828816](https://doi.org/10.1063/1.4828816).
- 862 **Oyler J**, Maljevic S, Scheffer IE, Berkovic SF, Petrou S, Reid CA. Ion channels in genetic epilepsy: from genes  
863 and mechanisms to disease-targeted therapies. *Pharmacol Rev*. 2018; 70(1):142–173.
- 864 **Piironen J**, Vehtari A. Comparison of Bayesian predictive methods for model selection. *Statistics and Comput-*  
865 *ing*. 2017; 27(3):711–735.
- 866 **Qin F**, Auerbach A, Sachs F. Hidden Markov Modeling for Single Channel Kinetics with Filtering and Correlated  
867 Noise. *Biophys J*. 2000; 79(4):1928–1944. doi: [10.1016/S0006-3495\(00\)76442-3](https://doi.org/10.1016/S0006-3495(00)76442-3).
- 868 **Rabiner LR**. A tutorial on hidden Markov models and selected applications in speech recognition. *Proc of the*  
869 *IEEE*. 1989 Feb; 77(2):257–286. doi: [10.1109/5.18626](https://doi.org/10.1109/5.18626).
- 870 **Rosales R**, Stark JA, Fitzgerald WJ, Hladky SB. Bayesian Restoration of Ion Channel Records using Hidden Markov  
871 Models. *Biophys J*. 2001; 80(3):1088–1103. doi: [10.1016/S0006-3495\(01\)76087-0](https://doi.org/10.1016/S0006-3495(01)76087-0).
- 872 **Rosales RA**. MCMC for hidden Markov models incorporating aggregation of states and filtering. *Bull Math Biol*.  
873 2004 Sep; 66(5):1173–1199. doi: [10.1016/j.bulm.2003.12.001](https://doi.org/10.1016/j.bulm.2003.12.001).
- 874 **Sakmann B**. *Single-channel recording*. Springer Science & Business Media; 2013.
- 875 **Siekman I**, Fackrell M, Crampin EJ, Taylor P. Modelling modal gating of ion channels with hierarchical Markov  
876 models. *Proc of the Roy Soc A- Math Phys*. 2016; 472(2192):20160122.
- 877 **Siekman I**, Sneyd J, Crampin EJ. MCMC Can Detect Nonidentifiable Models. *Biophys J*. 2012; 103(11):2275–  
878 2286. doi: [10.1016/j.bpj.2012.10.024](https://doi.org/10.1016/j.bpj.2012.10.024).

- 879 **Siekman I**, Wagner LE, Yule D, Fox C, Bryant D, Crampin EJ, Sneyd J. MCMC Estimation of Markov Models for  
880 Ion Channels. *Biophys J*. 2011; 100(8):1919–1929. doi: [10.1016/j.bpj.2011.02.059](https://doi.org/10.1016/j.bpj.2011.02.059).
- 881 **Smoluchowski Mv**. Versuch einer mathematischen Theorie der Koagulationskinetik kolloider Lösungen.  
882 *Zeitschrift für physikalische Chemie*. 1918; 92(1):129–168.
- 883 **Stepanyuk A**, Borisyuk A, Belan P. Maximum likelihood estimation of biophysical parameters of synaptic re-  
884 ceptors from macroscopic currents. *Frontiers in Cellular Neuroscience*. 2014; 8:303.
- 885 **Stepanyuk AR**, Borisyuk AL, Belan PV. Efficient Maximum Likelihood Estimation of Kinetic Rate Constants from  
886 Macroscopic Currents. *PLoS One*. 2011 12; 6(12):1–18. doi: [10.1371/journal.pone.0029731](https://doi.org/10.1371/journal.pone.0029731).
- 887 **Stone M**. An Asymptotic Equivalence of Choice of Model by Cross-Validation and Akaike's Criterion. *J of the*  
888 *Roy Statistical Soc: Series B (Methodological)*. 1977; 39(1):44–47. doi: [10.1111/j.2517-6161.1977.tb01603.x](https://doi.org/10.1111/j.2517-6161.1977.tb01603.x).
- 889 **Taraska JW**, Puljung MC, Olivier NB, Flynn GE, Zagotta WN. Mapping the structure and conformational move-  
890 ments of proteins with transition metal ion FRET. *Nature methods*. 2009; 6(7):532.
- 891 **Taraska JW**, Zagotta WN. Structural dynamics in the gating ring of cyclic nucleotide-gated ion channels. *Nature*  
892 *structural & molecular biology*. 2007; 14(9):854.
- 893 **van der Vaart A**. Bayes procedures. In: *Asymptotic Statistics* Cambridge University Press; 1998.p. 138–152.
- 894 **Van Kampen NG**. Stochastic processes in physics and chemistry, vol. 1. Elsevier; 1992.
- 895 **Varga RS**, et al. Minimal Gerschgorin sets. *Pacific Journal of Mathematics*. 1965; 15(2):719–729.
- 896 **Vehtari A**, Ojanen J. A survey of Bayesian predictive methods for model assessment, selection and comparison.  
897 *Statist Surv*. 2012; 6:142–228. doi: [10.1214/12-SS102](https://doi.org/10.1214/12-SS102).
- 898 **Vehtari A**, Ojanen J, et al. A survey of Bayesian predictive methods for model assessment, selection and com-  
899 parison. *Statistics Surveys*. 2012; 6:142–228.
- 900 **Venkataramanan L**, Sigworth F. Applying hidden Markov models to the analysis of single ion channel activity.  
901 *Biophys J*. 2002; 82(4):1930–1942.
- 902 **Verkerk AO**, Wilders R. Pacemaker activity of the human sinoatrial node: effects of HCN4 mutations on the  
903 hyperpolarization-activated current. *Europace*. 2014; 16(3):384–395.
- 904 **Wallace CS**. Statistical and Inductive Inference by Minimum Message Length. *Information Science and Statistics*,  
905 Berlin, Germany: Springer-Verlag; 2005.
- 906 **Wang W**, Feng X, Xuhui Z, Jing Y, Ming Y, Jiuping D. Optimal Estimation of Ion-Channel Kinetics from Macroscopic  
907 Currents. *PLoS One*. 2012 04; 7(4):1–12. doi: [10.1371/journal.pone.0035208](https://doi.org/10.1371/journal.pone.0035208).
- 908 **Watanabe S**. Almost All Learning Machines are Singular. In: *2007 IEEE Symposium on Foundations of Computa-*  
909 *tional Intelligence*; 2007. p. 383–388. doi: [10.1109/FOCI.2007.371500](https://doi.org/10.1109/FOCI.2007.371500).
- 910 **Watanabe S**. Asymptotic equivalence of Bayes cross validation and widely applicable information criterion in  
911 singular learning theory. *J of machine learning research*. 2010; .
- 912 **Weiss NA**. A Course in Probability. Boston, U.S.A.: Addison-Wesley; 2005.
- 913 **Wu S**, Vysotskaya ZV, Xu X, Xie C, Liu Q, Zhou L. State-Dependent cAMP Binding to Functioning HCN Channels  
914 Studied by Patch-Clamp Fluorometry. *Biophys J*. 2011; 100(5):1226–1232. doi: [10.1016/j.bpj.2011.01.034](https://doi.org/10.1016/j.bpj.2011.01.034).
- 915 **Wulf M**, Pless SA. High-Sensitivity fluorometry to resolve ion channel conformational dynamics. *Cell reports*.  
916 2018; 22(6):1615–1626.
- 917 **Zheng J**, Zagotta WN. Gating rearrangements in cyclic nucleotide-gated channels revealed by patch-clamp  
918 fluorometry. *Neuron*. 2000; 28(2):369–374.
- 919 **Zwickl DJ**, Holder MT. Model parameterization, prior distributions, and the general time-reversible model in  
920 Bayesian phylogenetics. *Systematic Biology*. 2004; 53(6):877–888.

921 **Appendix 1**

922 **An example emphasizing the importance of weakly informative priors for**  
 923 **complex models**

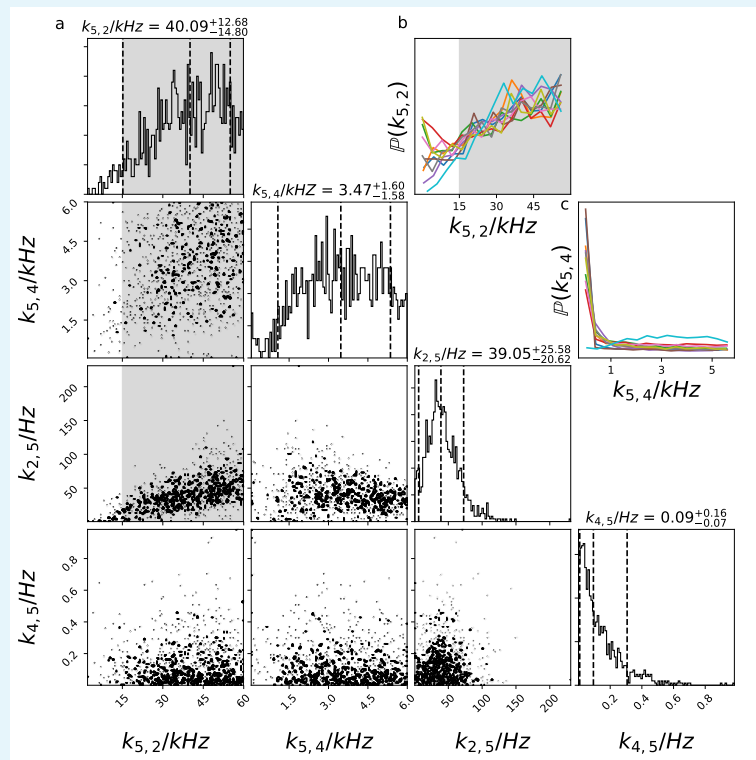

924

925 **Figure 1. a**, Posterior of the rates which are not present in the true process equipped with a uniform  
 926 prior on  $k_{5,2}$ . The uniform prior puts too much probability mass into regions (gray shaded) where one  
 927 should distrust the likelihood value due to limitations of the experiment. The likelihood cannot  
 928 confine  $k_{5,2}$  by the data such that the only limitation is the sampling box. **b**, This lack of information in  
 929 the data is true for 10 out of 10 data sets though some of the data sets show a local maximum for  
 930  $k_{5,2} \rightarrow 0$ . **c**, For  $k_{5,4}$  9 out of 10 data sets show a global maximum at  $k_{5,4} = 0$ , only the showcased data  
 931 set has significant probability mass for  $k_{5,4} > 0$ . Notice, that the first and second columns and rows  
 932 are displayed in kHz while the others are in Hz.

We demonstrate the influence of prior information for the model selection by continuous model expansion (Fig. 6 i-j). As argued in the main article, weakly informative prior distributions can support the algorithm to select simpler base models, which means concentrating the posterior for certain  $k_{i,j}$  around zero *Gelman et al. (2017)*. Here we show the effect of the halfnormal prior  $\mathbb{P}(k_{5,2})$  for the other rates and eigenvalues. We compare now (Appendix Fig. 1) posteriors of the rates of in model  $M_5$  which are not present in the true process. First, we use a prior  $k_{5,2} \sim \text{uniform}(0, 60\text{kHz})$  which places too much probability mass to high frequencies, if we consider that the frequency by which the KF analysed the data ranged from 83.3 Hz to 500 Hz. At a first glance one might see a finite peak in  $\mathbb{P}(k_{2,5})$ , implying that there is a second open state which opens at a similar rate as the true opening step. Looking at  $\mathbb{P}(k_{2,5}, k_{5,2})$  one realizes that the posterior has a ridge which appears in the marginal distribution  $\mathbb{P}(k_{2,5})$  as a peak. Most of that ridge lies in regions  $k_{5,2} > 10\text{kHz}$  where we should distrust the experimental data due to the noise and limited time resolution to reasonably constrain the model. Note that the used prior places 6 times more probability mass higher then the sampling frequency, which in case of weakly informative data is a strong statement for mag-

947  
948  
949  
950  
951  
952

nitude of  $k_{5,2}$  being greater than would could have been measured. As argued in the main text that would not be an issue if the data would be informative on  $k_{5,2}$ . Indeed,  $\mathbb{P}(k_{2,5}, k_{5,2})$  is bounded by the sampling box rather than by the data.

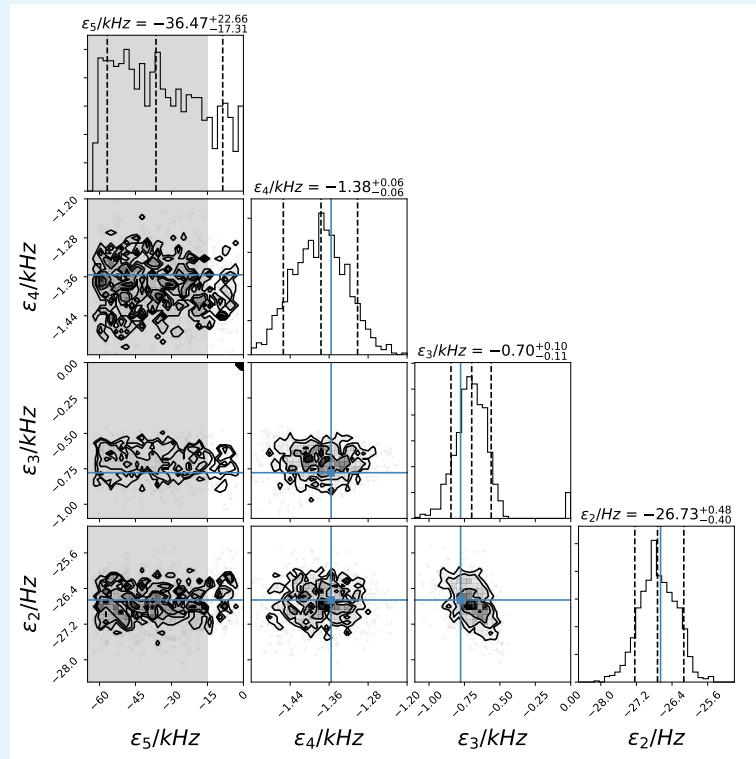

953  
954  
955  
956  
957  
958  
959

**Figure 2.** Posterior of the eigenvalues derived from the posterior of the rate matrix. We left out the equilibrium eigenvalue  $\epsilon_1 = 0$ , since by construction of the rate matrix it is always zero. The vertical dashed lines on the diagonal show the quantiles  $\{0.1, 0.5, 0.9\}$ . The posterior of the three slower eigenvalues cover the eigenvalues of the true process. Examining  $\epsilon_5$  reveals that roughly 90% of the probability mass belongs to eigenvalues faster than the sampling frequency. The upper limit of  $\epsilon_5$  is only confined by the sampling box but not by the data.

Closely related to the rate matrix is its spectrum of eigenvalues  $\epsilon$ . A kinetic scheme consisting of  $M$  states has  $M$  eigenvalues. The largest one is always zero **Colquhoun and Hawkes (1995)**. This eigenvalue corresponds to the equilibrium solution of the chemical network **Colquhoun and Hawkes (1995)**. All other  $M - 1$  eigenvalues are the negative inverse of the timescales on which deviations from the equilibrium distributions decay in time **Colquhoun and Hawkes (1995)**. The Gershgorin-circle theorem justifies this heuristic **Varga et al. (1965)**. It states, that the spectrum of a matrix is inside the union of Gershgorin-circles. For a matrix with real valued eigenvalues such as the rate matrix this statement simplifies to real valued intervals  $R$ . For the  $j$ -th column the Gershgorin-interval  $R_j$  is

$$R_j = [k_{j,j} - \sum_{i,i \neq j}^M k_{j,i}, k_{j,j} + \sum_{i,i \neq j}^M k_{j,i}] \quad (61)$$

We use the properties  $k_{i,j} > 0$ , for  $i \neq j$  and  $k_{j,j} = -\sum_{i,i \neq j}^M k_{j,i} < 0$  of a rate matrix and derive

$$R_j = [2k_{j,j}, 0] \quad (62)$$



974  
975  
976  
977  
978  
979  
980  
981  
982  
983  
984

Since the interval from the column with the smallest diagonal element  $k_{min} < 0$  covers all other intervals the union is

$$\epsilon_i \in R = [2k_{min}, 0] \quad (63)$$

Each eigenvalue is always larger than 2 times the smallest diagonal element but smaller than 0.

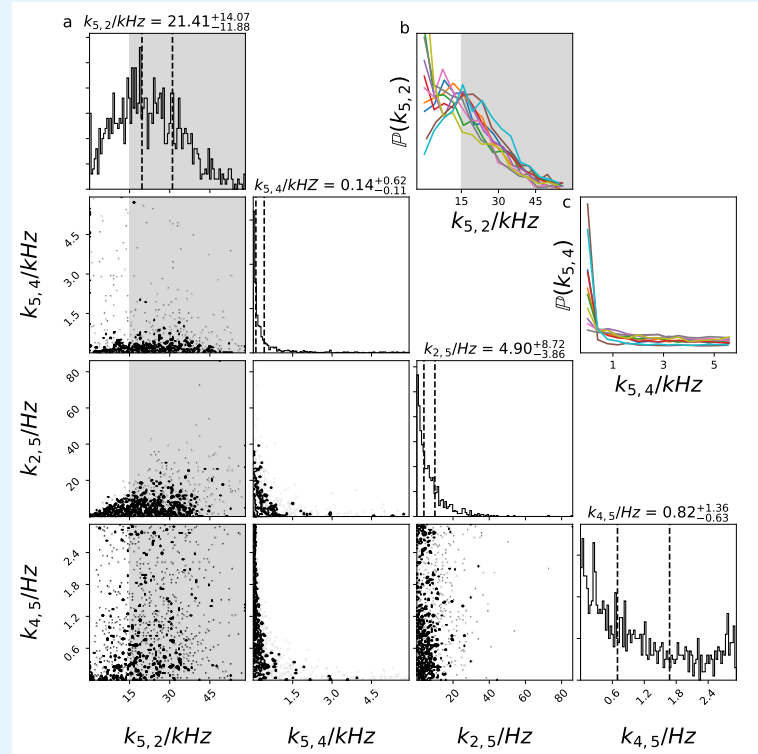

985  
986  
987  
988  
989  
990  
991  
992

**Figure 3. a**, Posterior of the rates which are not present in the true process equipped with a weakly informative prior  $k_{5,2} \sim \text{halfnormal}(0, 6 \text{ kHz})$ . Still there is much probability mass in unrealistic rate regions (gray shaded) and one can still identify the correlated structure of  $\mathbb{P}(k_{5,2}, k_{2,5})$  but the distribution, in particular the rates into the overfitting state  $O_5$ , show a distinct maximum for  $k \rightarrow 0$ . **b**, The posteriors for all data sets of  $\mathbb{P}(k_{5,2})$  show now the tendency to develop a peak for  $k_{5,2} \rightarrow 0$ . **c**, All data sets indicate that also  $k_{5,4}$  describes a process which is either slow beyond the time scales of the experiment or does not exist.

The unbounded rate  $\mathbb{P}(k_{5,2})$  creates a posterior for the eigenvalues (Appendix Fig. 2) whose 90% probability mass for  $\epsilon_5$  covers areas faster than what could have been measured. The algorithm places most of the probability mass where it does not harm the fit. Since disturbances corresponding to that eigenvalue Colquhoun and Hawkes (1995) suffered already, a strong decay before the next data point is measured. This should raise the concern that the model would do better without the fifth eigenvalue thus one of the five states should be left out. Not surprisingly, the likelihood benefits from increasing a rate which empties a state which does not exist in the true process. The posterior of the slower time scales  $\epsilon_4 - \epsilon_2$  (Appendix Fig. 2) covers the true values. From Appendix Eq. 5 it is clear that there is close correspondence between  $\epsilon_5$  and  $k_{5,2}$ . A prior such as  $k_{5,2} \sim \text{halfnormal}(0, 6 \text{ kHz})$  is still vague but values  $k_{5,2} > 10 \text{ kHz}$  are strongly penalized. The prior states that we only expect a rate close to the sampling rate if the data indicates it by a sharp likelihood peak which dominates the weakly regularising prior. The effect of that prior on the posterior of rates can be seen in (Appendix Fig. 3).  $\mathbb{P}(k_{2,5})$ . Develops a peak for  $k_{2,5} = 0$  and is much more concentrated

1005

1006

1007

1008

1009

1010

1011

1012

close to zero. It further emphasizes that  $O_5$  is a state which should be left out (Fig. 5 **i-j**). Additionally, with this weak constraint some of 10 data sets gain the tendency to develop a maximum at  $\mathbb{P}(k_{5,2} = 0)$  (Appendix Fig. 3)**b**. As a side effect, the prior helps to sample from the posterior in limited time because it suppresses the correlations in the high-dimensional tails.

## 1013 Appendix 2

### 1014 Markov Models for a single ion channel

1015 Markov models and rate models are widely used for modeling molecular kinetics. They provide  
1016 an interpretation of the data in terms of a set of functional states and the transition  
1017 rates between these states. Markov models can be estimated from experimentally recorded  
1018 data as well as from computer simulation data. The use of Markov models with one-step  
1019 memory is supported by the concept of the molecular free energy landscape. Molecular  
1020 energy landscapes are typically characterized by conformationally well defined free-energy  
1021 minima that are separated by free-energy barriers. State transitions in molecules are thermally  
1022 activated barrier-crossing events on this landscape *Frauenfelder et al. (1991)* leading  
1023 to a rapid equilibration of the system in the vicinity of this new minimum. Memory of other  
1024 minima that have been visited in the past is not required. Regarding the wide spectrum of  
1025 time scales at which processes in a protein take place, one has to be aware that there is  
1026 typically a small number of relaxation modes with excessively long autocorrelation times  
1027 and many relaxation modes with much faster autocorrelation times. To model the slow, experimentally  
1028 accessible processes, it is sufficient to retain the small number of slow modes  
1029 *Noé et al. (2011)*. It has been shown rigorously that working with the set of slow modes is  
1030 equivalent to model the state dynamics with a small number of fuzzily defined metastable  
1031 states in the full conformational space *Deuffhard and Weber (2005)*. Later it has been shown  
1032 that the set of slow modes can be well approximated with a hidden Markov model *Noé et al.*  
1033 *(2013b)*.

## 1034 Appendix 3

### 1035 The fluorescence signal of cPCF experiments

#### 1036 First four moments of a photomultiplier signal

1037 In this work, the KF analysis assumes Poisson statistics for the fluorescence signal in cPCF. Many commercial microscopes are not equipped with photon counting detectors or detectors are not operated in photon-counting mode, often to due to ease of use or limitation in dynamic range. Therefore, it is important to verify that the fluorescence signal follows, at least approximately, Poisson counting statistics. In particular, for the KF it is assumed that higher order statistics, such as skewness and excess kurtosis, vanish. The central assumption of the derivation of our Bayesian network is that  $\text{var}[y_{f1}] = \mathbb{E}[y_{f1}]$

1041 Here we show that this assumption for the detectors used in our system (Ch1 and Ch2, LSM 710, Carl Zeiss) under typical cPCF conditions is fulfilled by re-scaling to photon-numbers, The measured variance obeys  $\text{var}[y_{f1}] = a \cdot \mathbb{E}[y_{f1}]$ . It depends linearly on the mean signals (Appendix Fig. 1a).

$$1047 \text{var}[y] = a\mathbb{E}[y] \quad (64)$$

$$1048 \text{var}[\mu x] = a\mathbb{E}[\mu x] \quad (65)$$

$$1049 \mu^2 \text{var}[x] = a\mu \mathbb{E}[x] \quad (66)$$

1050 For the scaled signal  $x$  being Poisson distributed follows  $\mu = a$ . Then re-scaling of the signal by  $1/a$  provides approximately Poisson distributed values. A linear fit yields  $a = 205\text{a.u.}(16\text{ bit})/\text{photon}$  (for 680 V PMT voltage,  $3.26 \mu\text{s}$  pixel dwell time). Appendix Fig. 1 b,c) shows that excess kurtosis and skewness remain small at all levels of photons/pixel but are somewhat higher than theoretically predicted for Poisson-distributed data. The proportionalities are correctly described by the Poisson distribution assumption but the skewness and the kurtosis are too small by a constant factor of  $\sqrt{2}$  and 4, respectively. This finding has to be verified for different experimental conditions, because at lower concentration/particle densities and higher count rates, particle number fluctuations can dominate statistics *Brown et al. (2008)*. For comparison another option would be a Gamma distribution which has the mean and the variance of  $\mathbb{E}[y] = k\theta$  and  $\text{var}[y] = k\theta^2$ , respectively. Thus, the applied scaling requires that  $\theta = 1$ . The Gamma distribution has a higher skewness by factor two (independently of  $\theta$ ) than a Poisson distribution and overscores the skewness and excess kurtosis of the detector. For simplicity only the Poisson distribution is considered in this work. In conclusion: Typical cPCF fluorescence signal detection rates are well approximated by a Gamma or Poisson distribution which in turn have the desired property that can be approximated by a normal distribution.

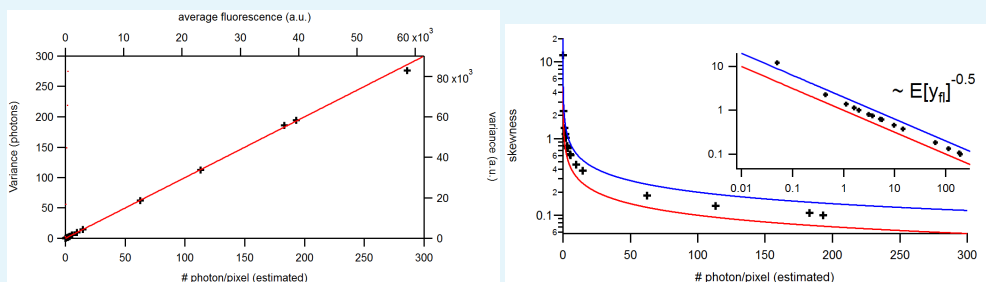

1069

1070

1071

1072

1073

1074

1075

1076

1077

1078

1079

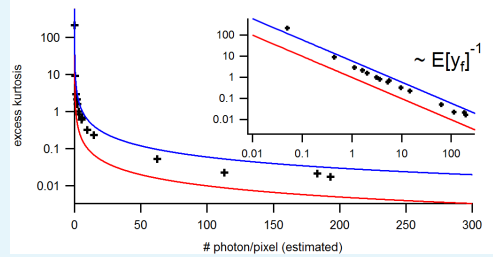

**Figure 1.** Benchmark of the signal statistics for experimental solution data recorded under cPCF conditions: The concentrations of the fluorescent ligand were 0.25, 3 and 15  $\mu M$  and a reference dye was present. The laser intensities covered 1.6 orders of magnitude at constant detection settings. The data points were obtained from  $1.4 \cdot 10^6$  pixel. The red and blue lines indicate the theoretical prediction for a Poisson and Gamma distribution, respectively, assuming  $\theta = 1$ . **a**, Variance vs. average. The linear relation allows to relate the measured a.u. (top, right axis) to photons (bottom, left axis). **b**, Skewness. **c**, Excess kurtosis. The higher moments are small but the values are slightly larger than theoretically predicted. The insets provide a corresponding log-log plot. Important for the KF algorithm is that skewness and excess kurtosis is small.

1081

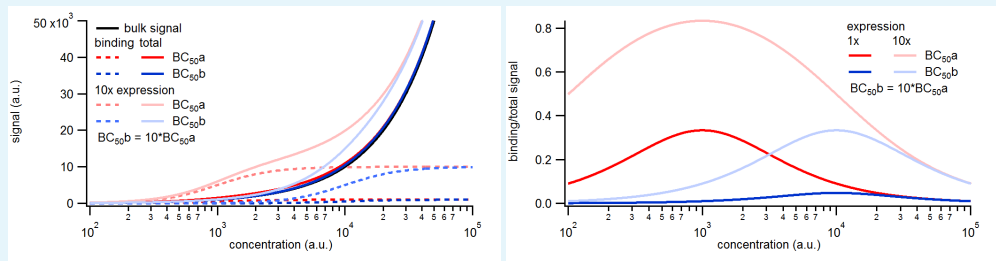

1082

1083

1084

1085

1086

1087

1088

1089

**Figure 2.** Simulated binding signals. **a**, Comparison of binding of a labeled ligand at two concentrations. A simple two-ligand binding process is simulated with the Hill equation for the two expression levels of 1,000 or 10,000 binding sites and a  $BC_{50}$  of 1,000 ( $BC_{50a}$ ) or 10,000 ( $BC_{50b}$ ), respectively, given in molecules per observation unit. The observed signal is the sum of the signal from ligands free in solution and bound to the receptors. The solution signal scales linearly with the concentration, while the binding signal saturates. **b**, Relative contribution of the binding signal to the total signal. Note that the contribution of the binding signal scales linearly with the expression level and inversely with the  $BC_{50}$ .

1091

## Background noise statistics

In cPCF measurements with fluorescence-labeled ligands, the signals of the ligands bound to the receptors overlap with the signals from freely diffusing fluorescence-labelled ligands in the bulk. This bulk signal is subtracted from the total signal *Biskup et al. (2007)*. While the mean difference signal  $y_{f1,k}(t)$  of the confocal voxel  $k$  represents the bound ligands in that voxel, its noise  $y_{\zeta,k}(t)$  originates from both bound and bulk ligands. The additional bulk signal, e.g. the fraction of bulk solution inside that voxel, varies from voxel to voxel and can hardly be described theoretically. Nevertheless, it can be determined experimentally *Biskup et al. (2007)*. At low expression levels or at ligand concentrations above low nano-molar levels, this background signal is not negligible. It scales linearly with the ligand concentration, while the signal from bound receptors depends on the affinity, as estimated by the concentration of half maximum binding  $BC_{50}$ , and the number of ion channels in the membrane of the observed volume. The binding signal saturates at high concentrations (Appendix Fig. 2). Thus, both high affinity (low  $BC_{50}$ ) and high expression reduce the relative contribution of the background to the overall signal, improving the signal to noise ratio.

Practically, the bulk signal is estimated by counter-staining the solution with a spectrally distinct reference dye *Biskup et al. (2007)*. The spatial distribution of this dye mimics the spatial distribution of the freely diffusing ligands. The bulk absolute concentration as well

1106

1107

1108

1109

1110

1111

1112

1113

1114

1115

1116

1117

1118

1119

1120

1121

1122

1123

1124

1125

1126

1127

1128

1129

1130

1131

1132

1133

1134

1135

1136

1137

1138

1139

1140

1141

1142

1143

1144

1145

1146

as the molecular brightness of the reference dye and the labeled ligand differ. Hence, the binding signal is calculated as the average pixel intensity of the scaled difference image between the signal of labeled ligand and reference dye according to

$$y_{fl,k} = y_{lig,total} - \hat{\lambda}_{lig,back} - (y_{fl,ref} - \hat{\lambda}_{ref,back}) \frac{\hat{\lambda}_{lig} - \hat{\lambda}_{lig,back}}{\hat{\lambda}_{ref} - \hat{\lambda}_{ref,back}}, \quad (67)$$

where  $\hat{\lambda}_{lig,back}$  and  $\hat{\lambda}_{ref,back}$  are the arithmetic mean background signals of the ligand and reference dye recorded beyond the membrane where no signal should be recorded. They represent a signal offset which needs to be subtracted. The mean intensities in the bulk,  $\hat{\lambda}_{bulk}$  and  $\hat{\lambda}_{ref}$ , are estimated outside the pipette. In order to get the correct scaling, the mean intensities need to be corrected by the respective mean background signals. If  $\frac{\hat{\lambda}_{lig} - \hat{\lambda}_{lig,back}}{\hat{\lambda}_{ref} - \hat{\lambda}_{ref,back}} = 1$  holds then  $y_{fl,bin}$  would be Skellam distributed *Hwang et al. (2007)*. The total signal is then  $y_{fl} = \sum_k y_{fl,k}$ . This procedure creates  $\mathbb{E}[y_{\zeta}] = 0$  but adds an additional noise term  $\zeta(t_j)$ . For the general case of different intensities, we name the distribution 'scaled Skellam distributed'. The scaling variance of the background noise in each voxel of the difference image

$$\sigma_{\zeta}^2 = \lambda_{lig} + \frac{\lambda_{lig}^2}{\lambda_{ref}} \quad (68)$$

is derived from simulated data in the Appendix 3.  $\lambda_{lig}$  and  $\lambda_{ref}$  are the fluorescence intensity from the freely diffusing ligands and reference dye molecules per voxel, respectively.  $\lambda_{lig}$  and  $\lambda_{ref}$  are proportional to the volume fraction of the voxel, which is occupied by the bulk, and to the respective concentrations. To achieve a symmetric  $\mathbb{P}(\zeta)$ , one can set  $\lambda_{lig} = \lambda_{ref}$ . The summed variance of all selected voxels can be tabulated according to

$$\Sigma_{back} = \begin{pmatrix} \sigma_{\zeta}^2 & 0 \\ 0 & 0 \end{pmatrix} \quad (69)$$

To mimic an experiment which creates time series data  $\zeta(t)$ , we draw Poisson numbers for the signal from the membrane  $Poisson(\mathbf{Hn}(t))$  and for the signal from the bulk we draw numbers from the two respective Poisson distributions. Then subtraction of the two background signals is performed according to

$$y_{bulk} = y_{lig,bulk} - y_{ref,bulk} \frac{\lambda_{lig,bulk}}{\lambda_{ref,bulk}} \quad (70)$$

assuming that the dark count signal has been correctly subtracted. Then we add the bulk signal to the bound ligand signal. In this way we produce a time trace with colored noise by the Gillespie algorithm and add white noise to time traces as it is observed in real experiments.

1147

### Deriving the moments of the background noise for the difference signal

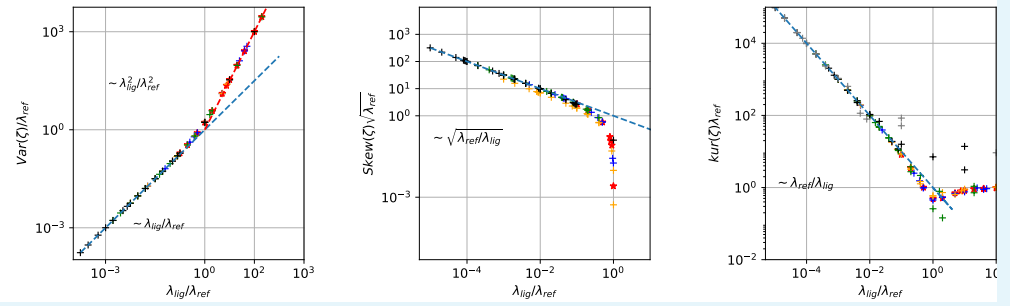

1148

1149

1150

1151

1152

**Figure 3.** Master curves of 2nd till 4th centralized moment of photon counting noise  $\zeta$  arising from the difference signal of fluorescent ligands and the dye in the bulk. The curves are created from  $4 \cdot 10^5$  draws from Poisson distributions with different combinations of intensities for the reference dye  $\lambda_{ref}$  and of the intensity of the confocal voxel fraction  $\lambda_{lig}$ .

1154

1155

1156

1157

1158

1159

1160

1161

1162

1163

1164

1165

1166

1167

1168

1169

1170

1171

1172

1173

1174

1175

1176

1177

1178

1179

1180

1181

1182

1183

1184

1185

1186

For the KF the variance, skewness and kurtosis arising from the background noise has to be calculated. Skewness and excess kurtosis of the distribution have to be small compared to the total variance of the signal including all noise sources because only in this case the KF algorithm can be considered as the optimal solution for the filtering and inference problem **Anderson and Moore (2012)**. In the following the 2nd to 4th moment of  $\zeta$  are derived. The noise intensity parameter of the reference dye  $\lambda_{ref}$  is proportional to  $\rho_{ref} \lambda_{bulk}$  with  $V$  being the confocal volume fraction containing fluorophores and  $\rho_{ref}$  the density of the fluorophores in this volume. In Appendix Fig. 3 we deduce master curves for the variance skewness and excess kurtosis of the white noise by drawing  $4 \cdot 10^5$  Poisson numbers from the respective Poisson distribution and subtract them from each other according to Appendix Eq. 70. The variance is derived empirically to be

$$\frac{\sigma_{\zeta}^2}{\lambda_{ref}} = \frac{\lambda_{lig}}{\lambda_{ref}} + \frac{\lambda_{lig}^2}{\lambda_{ref}^2}. \quad (71)$$

In Appendix Fig. S. 3 **a**, we confirm the intuition  $\lambda_{ref} \rightarrow \infty \Rightarrow \text{var}(\zeta) = \lambda_{lig}$ . Optimally, the skewness should be zero to avoid a biased estimate of  $\theta$  when the data are analyzed by the KF. Empirically, for  $\lambda_{lig} \ll \lambda_{ref}$  the skewness holds

$$\text{skew}(\zeta) \sqrt{\lambda_{ref}} = \sqrt{\frac{\lambda_{ref}}{\lambda_{lig}}} \quad (72)$$

Additionally for  $\lambda_{lig} < \lambda_{ref}$  the skewness holds

$$\text{skew}(\zeta) \sqrt{\lambda_{ref}} \leq \sqrt{\frac{\lambda_{ref}}{\lambda_{lig}}} \quad (73)$$

It is zero when  $\lambda_{ref} = \lambda_{lig}$ . The KF is optimal if the kurtosis excess approaches zero, in other words if  $\zeta$  is distributed normally. Empirically the kurtosis holds this

$$\text{kur}(\zeta) \lambda_{ref} \leq \frac{\lambda_{ref}}{\lambda_{lig}} \quad (74)$$

for  $\lambda_{ref} \leq \lambda_{lig}$ . The relative intensity  $\lambda_{lig}$  of the voxel fraction compared to the intensity  $\lambda_b$  depends on the affinity of the ligand to the receptor, the number of receptors in the patch, and the density of the fluorophores  $\rho_{lig}$  at the patch. For larger concentrations should be  $\lambda_{lig}/\lambda_{ref}$ .

## 1187 Appendix 4

### 1188 Output statistics of Bayesian networks

#### 1189 Classical Kalman Filter without open-channel noise

Assuming that current measurements are only compromised by additive technical white noise  $v$  but do not contain open-channel noise  $v_{op}$ , then our noise model reduces to

$$y(t) = \mathbf{H}\mathbf{n}(t) + v(t) \Leftrightarrow y \sim \mathcal{O}(y|\mathbf{n}) = \text{normal}(\mathbf{H}\mathbf{n}(t), \sigma_m^2) \quad (75)$$

The noise term  $v_m$  has a mean of  $\mathbb{E}[v_m] = 0$  and variance  $\mathbb{E}[v_m^2] = \sigma_m^2 = \text{const}$ . One has to keep in mind that we have to add an extra variance term originating from the dispersion of channels over state space, as encoded by  $\mathbf{P}(t)$  and  $\mathbf{n}(t)$ . The uncertainty  $\mathbf{P}(t)$  is calculated using Methods Eq. 30. The variance of the total output is

$$\text{var}(y(t), y(t)) = \mathbb{E}[(y(t) - \mathbb{E}[y(t)])(y(t) - \mathbb{E}[y(t)])^T] \quad (76a)$$

$$= \mathbb{E}[(y(t) - \mathbf{H}\mathbb{E}[\mathbf{n}(t)])(y(t) - \mathbf{H}\mathbb{E}[\mathbf{n}(t)])^T] \quad (76b)$$

$$= \mathbb{E}[(\mathbf{H}\mathbf{n}(t) + v(t) - \mathbf{H}\mathbb{E}[\mathbf{n}(t)])(\mathbf{H}\mathbf{n}(t) + v(t) - \mathbf{H}\mathbb{E}[\mathbf{n}(t)])^T] \quad (76c)$$

$$= \mathbf{H}\mathbb{E}[(\mathbf{n}(t) - \mathbb{E}[\mathbf{n}(t)])(\mathbf{n}(t) - \mathbb{E}[\mathbf{n}(t)])^T]\mathbf{H}^T + \mathbb{E}[v(t)^2] \quad (76d)$$

$$= \mathbf{H}\mathbf{P}(t)\mathbf{H}^T + \sigma_m \quad (76e)$$

$$(76f)$$

The two cross terms  $\mathbb{E}[v(t_1)(\mathbf{n} - \mathbb{E}[\mathbf{n}])^T\mathbf{H}^T]$  and  $\mathbb{E}[\mathbf{H}(\mathbf{n} - \mathbb{E}[\mathbf{n}])v(t_1)^T]$  are zero since  $v$  is independent of  $\mathbf{n}$  and  $\mathbb{E}[v_m] = 0$ . Our derivation is equivalent to marginalization over the predicted normal prior of the ensemble state  $\mathbb{P}(\mathbf{n}(t)|\mathcal{Y}_{t-1})$  at the time of the measurement except that the prior distribution could be any probability distribution with some mean and variance. Eq. 76 is the classical KF variance prediction of a signal. The first term in Eq. 76, describes the variance from stochastic gating and that the ensemble state is hidden. Notably, by Methods Eq. 30 we realize that  $\text{var}(y(t))$  contains information about  $\mathbf{T}$  and  $\mathbf{n}(t-1)$ , which we can exploit with the KF framework.

#### 1210 A generalized Kalman filter with state-dependent open-channel noise

Additional to the standard KF with only additive noise *Moffatt (2007); Anderson and Moore (2012); Chen et al. (2003)*, fluctuations arising from the single-channel gating lead to a second white-noise term  $v_{op}n_4(t)$ , causing state-dependency of our noise model. The output model is then

$$y(t) = \mathbf{H}\mathbf{n}(t) + v_m(t) + v_{op}(t) \Leftrightarrow y \sim p(y|\mathbf{n}) = \text{normal}(y|\mathbf{H}\mathbf{n}(t), \sigma_m^2 + n_4(t)\sigma_{op}^2) \quad (77)$$

The second noise term  $v_{op}$  is defined in terms of the first two moments  $\mathbb{E}(v_{op}) = 0$  and therefore  $\text{var}(v_{op}) = \mathbb{E}(v_{op}^2) = \sigma_{op}^2 n_4(t)$ . To the best of our knowledge such a state-dependent noise makes the following integration intractable

$$\mathbb{P}(y(t)) = \int \text{normal}(y|\mathbf{H}\mathbf{n}, \sigma_m^2 + n_4\sigma_{op}^2) \text{normal}(\mathbf{n}|\bar{\mathbf{n}}(t), \mathbf{P}(t)) d\mathbf{n} \quad (78a)$$

$$= \frac{1}{\text{const}} \int \exp\left(\frac{(y - \mathbf{H}\mathbf{n})^2}{2(\sigma_m^2 + n_4\sigma_{op}^2)}\right) \exp\left(\frac{1}{2}(\mathbf{n} - \bar{\mathbf{n}}(t))\mathbf{P}^{-1}(\mathbf{n} - \bar{\mathbf{n}}(t))^T\right) d\mathbf{n} \quad (78b)$$

When assuming that the relative fluctuations of  $\mathbf{n}(t)$  are small on average then  $n_4$  in the denominator is close to  $\mathbb{E}(n_4)$  of the state. Thus the incremental likelihood can be written as



1225

1226

1227

1228

in the standard KF, just with the difference that the measurement noise is the sum of two components.

1229

$$\mathbf{y}(t) \sim \text{normal}(\mathbf{H}\bar{\mathbf{n}}(t), \sigma_m^2 + \sigma_{\text{op}}^2 \bar{n}_4(t) + \mathbf{H}\mathbf{P}\mathbf{H}^\top) \quad (79)$$

1230

To see that this approximation of the variance is correct, we apply the law of total variance decomposition *Weiss (2005)*.

1231

1232

$$\text{var}(\mathbf{y}(t)) = \mathbb{E}[\text{var}[\mathbf{y}(t)|\mathbf{n}(t)]] + \text{var}[\mathbb{E}[\mathbf{y}(t)|\mathbf{n}(t)]] \quad (80a)$$

1233

$$= \mathbb{E}[\Sigma + \sigma_{\text{op}}^2 n_4(t)] + \text{var}[\mathbf{H}\mathbf{n}(t)] \quad (80b)$$

1234

$$= \sigma_m^2 + \sigma_{\text{op}}^2 \mathbb{E}[n_4(t)] + \mathbf{H}\mathbf{P}(t)\mathbf{H}^\top \quad (80c)$$

1235

1236

1237

The terms  $\mathbf{H}\mathbf{P}(t)\mathbf{H}^\top + \sigma_m^2$  are the standard output covariance matrix. Again  $\mathbf{P}(t)$  contains information about  $\mathbf{T}$ ,  $\mathbf{n}(t-1)$  while the additional variance term includes information about about the current  $\mathbf{n}(t)$ . The information in the noise enters in two ways the likelihood of the data. By the variance or covariance of the current  $\mathbf{y}(t)$  but also for  $\mathbf{y}(t+1)$  in correction step by the Kalman gain  $\mathbf{K}$  matrix defined in the next section.

1238

1239

1240

1241
